# Supplementary material for: Differential DNA methylation patterns of polycystic ovarian syndrome in whole blood of Chinese women
Source: PubMed Central journal article supplement (PMC5400534; doi:10.18632/oncotarget.9327), 2016-05-12
Supplement: oncotarget-08-20656-s001.pdf [file oncotarget-08-20656-s001.pdf]

# Differential DNA methylation patterns of polycystic ovarian syndrome in whole blood of Chinese women

## Supplementary Materials

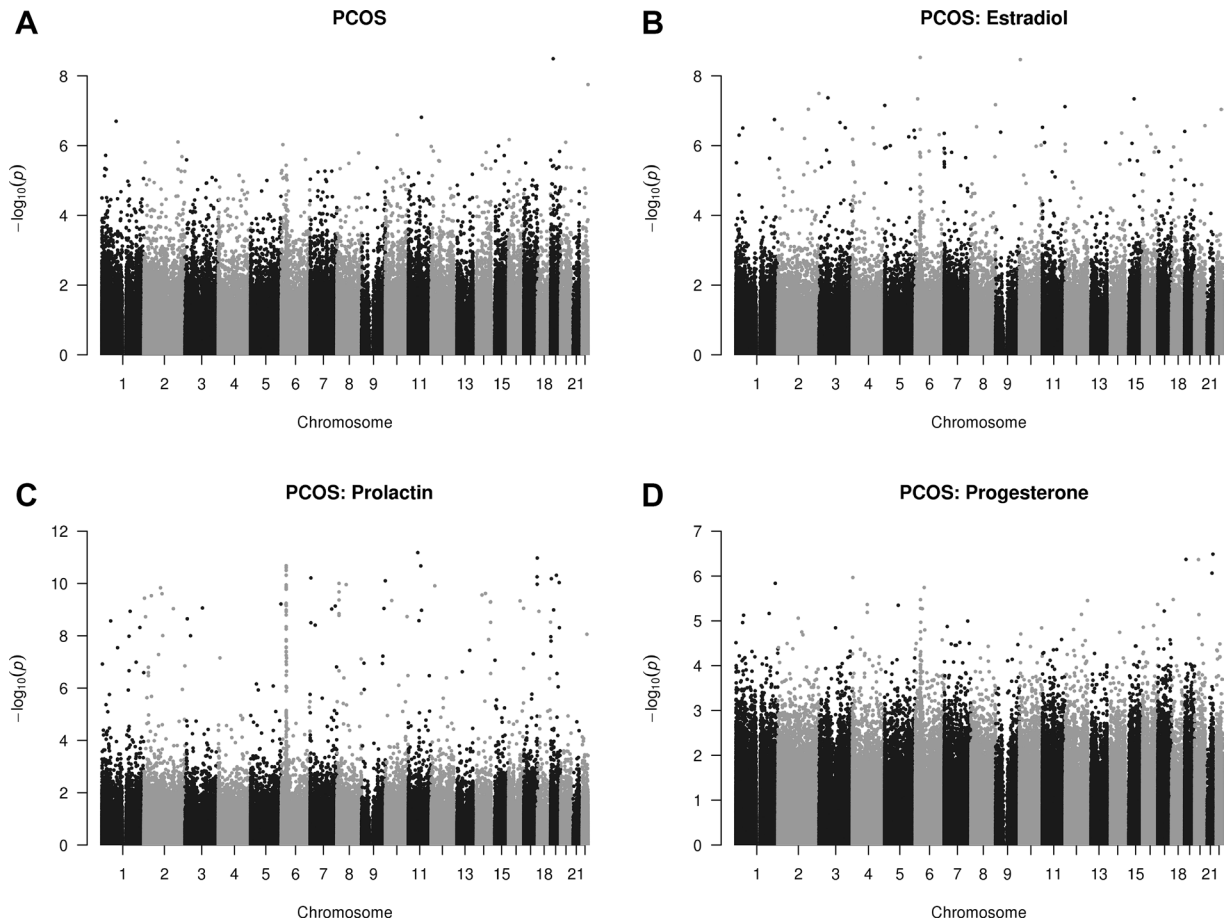

**Supplementary Figure S1:** Manhattan plots for the negative log<sub>10</sub>-transformed p values from EWAS on PCOS (A), and EWAS in PCOS patients on E2 (B), prolactin (C) and progesterone (D) plotted against genomic location (Mb) for each CpG. The distinct pattern for prolactin on chromosome 6 is further displayed by a chromosome-wise Manhattan plot in Figure 2.

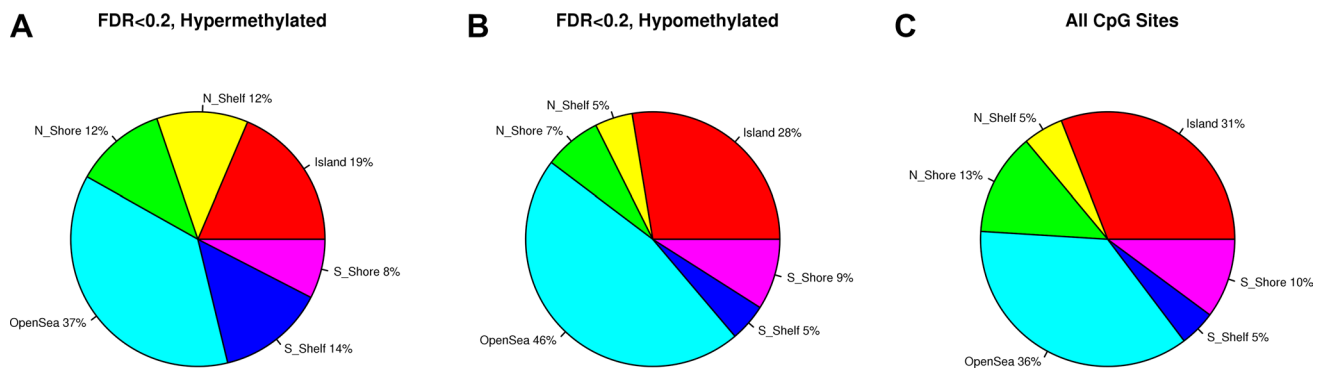

**Supplementary Figure S2:** Pie plots for the distribution of CpGs associated with PCOS status for hypermethylated (A), hypomethylated (B) CpGs with FDR < 0.2, and for all CpGs analysed on the array (C).

**Supplementary Table S1: CpGs associated with PCOS**

| CPG        | meanPcos    | meanControl | Diff         | pval     | qval        | chr   | pos       |
|------------|-------------|-------------|--------------|----------|-------------|-------|-----------|
| cg23647968 | 0.847061568 | 0.820176263 | 0.026885304  | 3.22E-09 | 0.001471148 | chr19 | 15051936  |
| cg09456760 | 0.755388715 | 0.717660252 | 0.037728463  | 1.77E-08 | 0.004043544 | chr22 | 51206645  |
| cg03197935 | 0.913973672 | 0.887855623 | 0.026118049  | 1.54E-07 | 0.022869    | chr11 | 77885410  |
| cg10827434 | 0.698378549 | 0.668805774 | 0.029572774  | 2.01E-07 | 0.022869    | chr1  | 84944976  |
| cg07921144 | 0.777264189 | 0.799479219 | -0.022215029 | 4.95E-07 | 0.043882351 | chr10 | 70184359  |
| cg04737885 | 0.87137745  | 0.815687391 | 0.055690059  | 6.76E-07 | 0.043882351 | chr16 | 4014095   |
| cg08123608 | 0.830746535 | 0.811007865 | 0.01973867   | 7.88E-07 | 0.043882351 | chr2  | 201927099 |
| cg19110428 | 0.622633757 | 0.569931651 | 0.052702105  | 8.02E-07 | 0.043882351 | chr20 | 30324912  |
| cg01679528 | 0.660663744 | 0.634123913 | 0.026539831  | 9.37E-07 | 0.043882351 | chr6  | 10430966  |
| cg06030190 | 0.151441802 | 0.168791335 | -0.017349534 | 1.02E-06 | 0.043882351 | chr15 | 43029558  |
| cg20454537 | 0.850726081 | 0.826026481 | 0.0246996    | 1.06E-06 | 0.043882351 | chr12 | 822286    |
| cg21472448 | 0.715554946 | 0.75283076  | -0.037275814 | 1.43E-06 | 0.046226847 | chr12 | 13156131  |
| cg00703849 | 0.813809    | 0.775001563 | 0.038807437  | 1.47E-06 | 0.046226847 | chr19 | 53229766  |
| cg04224092 | 0.909150343 | 0.888050429 | 0.021099914  | 1.56E-06 | 0.046226847 | chr14 | 77247777  |
| cg12154749 | 0.766643613 | 0.791216125 | -0.024572511 | 1.59E-06 | 0.046226847 | chrX  | 103176599 |
| cg17820495 | 0.59077952  | 0.627429481 | -0.036649962 | 1.62E-06 | 0.046226847 | chr8  | 128844842 |
| cg00165619 | 0.623362646 | 0.655355831 | -0.031993185 | 1.91E-06 | 0.048820546 | chr1  | 22903087  |
| cg24133724 | 0.590950244 | 0.61122771  | -0.020277466 | 1.93E-06 | 0.048820546 | chr15 | 77271602  |
| cg13131061 | 0.79096052  | 0.766329313 | 0.024631207  | 2.07E-06 | 0.049605365 | chr2  | 225268095 |
| cg18368637 | 0.626520673 | 0.657858413 | -0.031337741 | 2.49E-06 | 0.0497538   | chr6  | 144179905 |
| cg04475307 | 0.817303343 | 0.777831685 | 0.039471658  | 2.56E-06 | 0.0497538   | chr3  | 9694905   |
| cg18341969 | 0.138039172 | 0.1628806   | -0.024841428 | 2.61E-06 | 0.0497538   | chr19 | 571802    |
| cg25928510 | 0.852539891 | 0.840073508 | 0.012466383  | 2.70E-06 | 0.0497538   | chr12 | 45749440  |
| cg07359604 | 0.74746872  | 0.762160862 | -0.014692142 | 2.76E-06 | 0.0497538   | chr15 | 25415763  |
| cg14217534 | 0.1085838   | 0.097287356 | 0.011296444  | 2.79E-06 | 0.0497538   | chr12 | 49525474  |
| cg25494151 | 0.110855693 | 0.136960392 | -0.026104698 | 3.04E-06 | 0.0497538   | chr2  | 7006339   |
| cg07940280 | 0.841908487 | 0.818550415 | 0.023358071  | 3.14E-06 | 0.0497538   | chr17 | 11054037  |
| cg18227776 | 0.806633573 | 0.828776695 | -0.022143122 | 3.23E-06 | 0.0497538   | chr8  | 71063694  |
| cg05138082 | 0.878508903 | 0.861473428 | 0.017035475  | 3.63E-06 | 0.0497538   | chr14 | 54392087  |
| cg22179059 | 0.868150466 | 0.841396198 | 0.026754268  | 3.66E-06 | 0.0497538   | chr6  | 29714945  |
| cg02896705 | 0.609246982 | 0.588930399 | 0.020316583  | 3.76E-06 | 0.0497538   | chr19 | 18112042  |
| cg25493545 | 0.102766653 | 0.119669235 | -0.016902582 | 3.93E-06 | 0.0497538   | chr19 | 10812419  |
| cg15985418 | 0.914919536 | 0.905735814 | 0.009183722  | 4.13E-06 | 0.0497538   | chr19 | 49173732  |
| cg01982835 | 0.770527939 | 0.810153243 | -0.039625303 | 4.21E-06 | 0.0497538   | chr20 | 34995278  |
| cg07645718 | 0.09100693  | 0.110580173 | -0.019573242 | 4.30E-06 | 0.0497538   | chr20 | 61493192  |
| cg23281369 | 0.102672743 | 0.114850299 | -0.012177556 | 4.30E-06 | 0.0497538   | chr9  | 91933285  |
| cg07240000 | 0.146678451 | 0.164878525 | -0.018200074 | 4.53E-06 | 0.0497538   | chr1  | 17878538  |
| cg25966751 | 0.547743559 | 0.565402519 | -0.01765896  | 4.54E-06 | 0.0497538   | chr14 | 74098320  |
| cg14266436 | 0.883222741 | 0.876461954 | 0.006760787  | 4.57E-06 | 0.0497538   | chr19 | 34302242  |
| cg08092966 | 0.871948537 | 0.888617428 | -0.016668891 | 4.59E-06 | 0.0497538   | chr8  | 19009591  |
| cg10281977 | 0.284819895 | 0.353605549 | -0.068785654 | 4.61E-06 | 0.0497538   | chr14 | 105070864 |
| cg14376110 | 0.678155355 | 0.655080917 | 0.023074439  | 4.77E-06 | 0.0497538   | chr2  | 202354859 |
| cg15788059 | 0.894690996 | 0.879478165 | 0.015212831  | 4.79E-06 | 0.0497538   | chr22 | 26961237  |
| cg10176185 | 0.861428543 | 0.842802362 | 0.01862618   | 4.80E-06 | 0.0497538   | chr1  | 25894479  |
| cg10715637 | 0.16788488  | 0.206197918 | -0.038313038 | 4.91E-06 | 0.0497538   | chr10 | 90751534  |

|            |             |             |              |          |             |       |           |
|------------|-------------|-------------|--------------|----------|-------------|-------|-----------|
| cg14582248 | 0.743820441 | 0.778120355 | -0.034299913 | 5.19E-06 | 0.049815898 | chr6  | 5066984   |
| cg21821755 | 0.930495223 | 0.922148033 | 0.00834719   | 5.39E-06 | 0.049815898 | chr7  | 88315898  |
| cg12046414 | 0.084512498 | 0.100154771 | -0.015642273 | 5.40E-06 | 0.049815898 | chr2  | 220379199 |
| cg18356974 | 0.322261855 | 0.363458605 | -0.04119675  | 5.40E-06 | 0.049815898 | chr7  | 128809100 |
| cg19838074 | 0.894967865 | 0.88852596  | 0.006441905  | 5.46E-06 | 0.049815898 | chr2  | 242149865 |
| cg09857761 | 0.84971994  | 0.862956676 | -0.013236736 | 5.60E-06 | 0.049846644 | chr16 | 815553    |
| cg03881524 | 0.777887088 | 0.79596786  | -0.018080772 | 5.68E-06 | 0.049846644 | chr7  | 47165287  |
| cg26241240 | 0.615258685 | 0.650227232 | -0.034968547 | 6.08E-06 | 0.051739581 | chr11 | 60893661  |
| cg05175353 | 0.951897702 | 0.939760392 | 0.01213731   | 6.19E-06 | 0.051739581 | chr6  | 596127    |
| cg19212550 | 0.605908766 | 0.571054158 | 0.034854608  | 6.24E-06 | 0.051739581 | chr10 | 101767908 |
| cg14857063 | 0.932732102 | 0.916261482 | 0.01647062   | 6.65E-06 | 0.05416591  | chr13 | 110763402 |
| cg20535253 | 0.900829218 | 0.875681243 | 0.025147975  | 7.06E-06 | 0.054866312 | chr4  | 122875768 |
| cg14833935 | 0.908389292 | 0.917712972 | -0.00932368  | 7.08E-06 | 0.054866312 | chr6  | 31927895  |
| cg23843045 | 0.723134234 | 0.694576411 | 0.028557824  | 7.18E-06 | 0.054866312 | chr4  | 123297318 |
| cg16883533 | 0.127965545 | 0.139096537 | -0.011130992 | 7.23E-06 | 0.054866312 | chr12 | 7079667   |
| cg00953309 | 0.889825126 | 0.876066163 | 0.013758964  | 7.34E-06 | 0.054866312 | chr1  | 16460784  |
| cg24466610 | 0.931872954 | 0.92261223  | 0.009260725  | 7.98E-06 | 0.058696288 | chr11 | 433702    |
| cg03413208 | 0.925994669 | 0.936343406 | -0.010348737 | 8.20E-06 | 0.058977974 | chr3  | 160879619 |
| cg06925530 | 0.839396615 | 0.85047034  | -0.011073725 | 8.27E-06 | 0.058977974 | chr6  | 16347397  |
| cg07957471 | 0.952986407 | 0.94381576  | 0.009170647  | 8.60E-06 | 0.058989014 | chr10 | 49658574  |
| cg03349251 | 0.796787769 | 0.757276657 | 0.039511112  | 8.62E-06 | 0.058989014 | chr6  | 10832472  |
| cg23457357 | 0.736802767 | 0.705566711 | 0.031236056  | 8.71E-06 | 0.058989014 | chr6  | 31148748  |
| cg17886715 | 0.682407193 | 0.716932708 | -0.034525516 | 8.79E-06 | 0.058989014 | chr1  | 247269490 |
| cg06096916 | 0.880015471 | 0.865146268 | 0.014869203  | 9.17E-06 | 0.059552749 | chr7  | 1989032   |
| cg01381374 | 0.537326866 | 0.559360672 | -0.022033806 | 9.46E-06 | 0.059552749 | chr7  | 93474158  |
| cg00415763 | 0.690788081 | 0.662532959 | 0.028255122  | 9.57E-06 | 0.059552749 | chr16 | 66984264  |
| cg24609304 | 0.846329132 | 0.862898498 | -0.016569365 | 9.62E-06 | 0.059552749 | chr2  | 32483287  |
| cg08961047 | 0.884492596 | 0.868176909 | 0.016315687  | 9.65E-06 | 0.059552749 | chr6  | 34395138  |
| cg27567135 | 0.662144319 | 0.67931311  | -0.017168791 | 9.71E-06 | 0.059552749 | chr17 | 53095518  |
| cg25867545 | 0.301429029 | 0.319451226 | -0.018022197 | 9.79E-06 | 0.059552749 | chr3  | 182880776 |
| cg18112295 | 0.1069577   | 0.120411242 | -0.013453541 | 9.96E-06 | 0.059810246 | chr5  | 96519566  |
| cg26547526 | 0.835092431 | 0.815970167 | 0.019122264  | 1.04E-05 | 0.060853658 | chr10 | 2666743   |
| cg22447396 | 0.589553583 | 0.56848849  | 0.021065094  | 1.05E-05 | 0.060853658 | chr1  | 153966266 |
| cg12935979 | 0.563954749 | 0.6024864   | -0.038531651 | 1.06E-05 | 0.060853658 | chr4  | 147559648 |
| cg03889810 | 0.882511948 | 0.854603633 | 0.027908315  | 1.07E-05 | 0.060853658 | chr7  | 97884367  |
| cg08676905 | 0.1113959   | 0.128854391 | -0.017458491 | 1.09E-05 | 0.061397533 | chr10 | 6019609   |
| cg25059588 | 0.859962398 | 0.875666772 | -0.015704373 | 1.11E-05 | 0.061864999 | chr2  | 220286185 |
| cg04181696 | 0.843863113 | 0.857833881 | -0.013970768 | 1.15E-05 | 0.062975854 | chr2  | 60981948  |
| cg10582639 | 0.37162268  | 0.344186355 | 0.027436325  | 1.17E-05 | 0.063358016 | chr11 | 121526840 |
| cg04216796 | 0.880067949 | 0.865073597 | 0.014994352  | 1.18E-05 | 0.063358016 | chr3  | 128770015 |
| cg19471725 | 0.831534764 | 0.798268129 | 0.033266635  | 1.20E-05 | 0.063621771 | chr3  | 126113344 |
| cg07809831 | 0.877661991 | 0.858000951 | 0.019661039  | 1.24E-05 | 0.063809485 | chr16 | 48428016  |
| cg22375623 | 0.760500643 | 0.73957915  | 0.020921493  | 1.24E-05 | 0.063809485 | chr15 | 78444981  |
| cg26756396 | 0.768880221 | 0.734714467 | 0.034165754  | 1.24E-05 | 0.063809485 | chr19 | 7459296   |
| cg17445987 | 0.128754538 | 0.14673055  | -0.017976012 | 1.27E-05 | 0.064494536 | chr19 | 10305305  |
| cg24005743 | 0.480722913 | 0.49615575  | -0.015432837 | 1.32E-05 | 0.065592546 | chr11 | 32112810  |
| cg15068487 | 0.170377729 | 0.144147787 | 0.026229942  | 1.33E-05 | 0.065592546 | chr2  | 15701235  |

|            |             |             |              |          |             |       |           |
|------------|-------------|-------------|--------------|----------|-------------|-------|-----------|
| cg11150068 | 0.10474812  | 0.120414803 | -0.015666684 | 1.34E-05 | 0.065592546 | chr10 | 111683422 |
| cg06820859 | 0.854018553 | 0.835942886 | 0.018075666  | 1.37E-05 | 0.065592546 | chr13 | 21564784  |
| cg16275967 | 0.133182338 | 0.118376551 | 0.014805787  | 1.37E-05 | 0.065592546 | chr1  | 161172255 |
| cg12582138 | 0.880035182 | 0.873080586 | 0.006954597  | 1.38E-05 | 0.065592546 | chr17 | 48183477  |
| cg14151995 | 0.787593153 | 0.761727289 | 0.025865864  | 1.41E-05 | 0.066081594 | chr11 | 17793529  |
| cg09675820 | 0.89926811  | 0.890168202 | 0.009099908  | 1.42E-05 | 0.066081594 | chr17 | 77997453  |
| cg02070290 | 0.912873615 | 0.898606917 | 0.014266699  | 1.46E-05 | 0.067508429 | chr17 | 68071397  |
| cg05844366 | 0.603847168 | 0.639590887 | -0.03574372  | 1.49E-05 | 0.068106268 | chr10 | 91738713  |
| cg10811509 | 0.654476312 | 0.674357223 | -0.019880911 | 1.53E-05 | 0.068840217 | chr19 | 27739313  |
| cg03292388 | 0.236203977 | 0.199499189 | 0.036704788  | 1.55E-05 | 0.068840217 | chr4  | 8594514   |
| cg25951580 | 0.102865129 | 0.13032228  | -0.027457151 | 1.55E-05 | 0.068840217 | chr19 | 58962937  |
| cg03983808 | 0.654200764 | 0.634636679 | 0.019564084  | 1.58E-05 | 0.069292916 | chr10 | 43133352  |
| cg09362956 | 0.892909606 | 0.919567918 | -0.026658312 | 1.64E-05 | 0.071385779 | chr22 | 32749962  |
| cg04171308 | 0.099404775 | 0.109135612 | -0.009730837 | 1.69E-05 | 0.072698667 | chr12 | 112856542 |
| cg06832605 | 0.414216957 | 0.435915753 | -0.021698796 | 1.72E-05 | 0.073509104 | chr20 | 26319303  |
| cg27105914 | 0.646209477 | 0.611742969 | 0.034466508  | 1.75E-05 | 0.073509104 | chr17 | 76445798  |
| cg08862717 | 0.595382958 | 0.562576465 | 0.032806493  | 1.77E-05 | 0.073509104 | chr2  | 101763598 |
| cg09767616 | 0.630652754 | 0.653749114 | -0.023096359 | 1.77E-05 | 0.073509104 | chr19 | 58115732  |
| cg05825127 | 0.831425971 | 0.846937081 | -0.015511109 | 1.81E-05 | 0.073687248 | chr10 | 121398040 |
| cg13663416 | 0.88289499  | 0.873083114 | 0.009811875  | 1.82E-05 | 0.073687248 | chr17 | 4868062   |
| cg12798564 | 0.541554718 | 0.570952523 | -0.029397805 | 1.83E-05 | 0.073687248 | chr3  | 75263641  |
| cg01403307 | 0.83509638  | 0.849446794 | -0.014350414 | 1.86E-05 | 0.074407588 | chr10 | 134303076 |
| cg18005896 | 0.824548715 | 0.842051054 | -0.017502339 | 1.88E-05 | 0.074407588 | chr6  | 168948135 |
| cg19955849 | 0.849632484 | 0.827016688 | 0.022615796  | 1.90E-05 | 0.074713136 | chr4  | 140095286 |
| cg15209934 | 0.553235794 | 0.517423528 | 0.035812267  | 1.93E-05 | 0.074974795 | chr19 | 52800385  |
| cg12216772 | 0.693528313 | 0.656146717 | 0.037381596  | 1.95E-05 | 0.074974795 | chr10 | 46164062  |
| cg20731100 | 0.731801833 | 0.705881319 | 0.025920514  | 1.98E-05 | 0.074974795 | chr7  | 47298162  |
| cg20646500 | 0.555932874 | 0.49458779  | 0.061345084  | 2.01E-05 | 0.074974795 | chr6  | 42536105  |
| cg24907970 | 0.054835867 | 0.042257018 | 0.012578848  | 2.01E-05 | 0.074974795 | chr5  | 65018155  |
| cg02454501 | 0.089473122 | 0.123292242 | -0.03381912  | 2.02E-05 | 0.074974795 | chr11 | 8285505   |
| cg18249414 | 0.892823075 | 0.881788203 | 0.011034872  | 2.02E-05 | 0.074974795 | chr15 | 101626335 |
| cg24688939 | 0.924756676 | 0.918207878 | 0.006548798  | 2.07E-05 | 0.076007231 | chr21 | 47545588  |
| cg04252689 | 0.863876618 | 0.843456801 | 0.020419817  | 2.10E-05 | 0.076007231 | chr19 | 52210193  |
| cg24148757 | 0.58260589  | 0.610485414 | -0.027879524 | 2.10E-05 | 0.076007231 | chr1  | 112942995 |
| cg05523455 | 0.163006047 | 0.176354811 | -0.013348763 | 2.13E-05 | 0.076678425 | chr9  | 136243219 |
| cg06529894 | 0.896453319 | 0.878219494 | 0.018233826  | 2.16E-05 | 0.076915707 | chr7  | 76025038  |
| cg13947513 | 0.91118286  | 0.899493635 | 0.011689226  | 2.23E-05 | 0.078693823 | chr4  | 172824551 |
| cg15980914 | 0.72516401  | 0.759487223 | -0.034323212 | 2.24E-05 | 0.078693823 | chr19 | 28297092  |
| cg01441105 | 0.797149637 | 0.813971394 | -0.016821757 | 2.34E-05 | 0.081471851 | chr22 | 38469264  |
| cg10318313 | 0.466300788 | 0.485136903 | -0.018836115 | 2.40E-05 | 0.082294307 | chr11 | 3014937   |
| cg08539210 | 0.165012897 | 0.196644912 | -0.031632014 | 2.41E-05 | 0.082294307 | chr16 | 90038463  |
| cg23924911 | 0.731528552 | 0.750997943 | -0.019469391 | 2.42E-05 | 0.082294307 | chr19 | 43200890  |
| cg20368463 | 0.95120075  | 0.960552903 | -0.009352153 | 2.45E-05 | 0.082315057 | chr18 | 77673604  |
| cg14028967 | 0.691657647 | 0.70844449  | -0.016786844 | 2.49E-05 | 0.082315057 | chr9  | 37419444  |
| cg14339397 | 0.539873517 | 0.503753511 | 0.036120007  | 2.49E-05 | 0.082315057 | chr13 | 27338713  |
| cg25652781 | 0.869169207 | 0.882797774 | -0.013628567 | 2.49E-05 | 0.082315057 | chr4  | 153586344 |
| cg15653559 | 0.869892352 | 0.853737111 | 0.016155241  | 2.56E-05 | 0.083327483 | chr6  | 31597080  |

|            |             |             |              |          |             |       |           |
|------------|-------------|-------------|--------------|----------|-------------|-------|-----------|
| cg01016459 | 0.096064981 | 0.10888072  | -0.012815739 | 2.57E-05 | 0.083327483 | chr16 | 53468960  |
| cg12977937 | 0.708926893 | 0.637380818 | 0.071546075  | 2.58E-05 | 0.083327483 | chr17 | 54860136  |
| cg01971789 | 0.940530954 | 0.929880006 | 0.010650948  | 2.59E-05 | 0.083327483 | chr6  | 28889545  |
| cg08486065 | 0.924829953 | 0.918333693 | 0.00649626   | 2.75E-05 | 0.084059122 | chr19 | 3464875   |
| cg13936208 | 0.795241673 | 0.78193364  | 0.013308033  | 2.76E-05 | 0.084059122 | chr12 | 121835047 |
| cg11704463 | 0.852652929 | 0.838402338 | 0.014250591  | 2.78E-05 | 0.084059122 | chr12 | 124968399 |
| cg25753720 | 0.925320767 | 0.941618636 | -0.016297869 | 2.80E-05 | 0.084059122 | chr2  | 200904751 |
| cg10081115 | 0.818626549 | 0.846775784 | -0.028149235 | 2.84E-05 | 0.084059122 | chr2  | 190686883 |
| cg21400851 | 0.608521573 | 0.631992007 | -0.023470434 | 2.84E-05 | 0.084059122 | chr17 | 73056681  |
| cg11830508 | 0.887142343 | 0.87300111  | 0.014141233  | 2.85E-05 | 0.084059122 | chr5  | 179920202 |
| cg17851126 | 0.83271607  | 0.819546153 | 0.013169917  | 2.87E-05 | 0.084059122 | chr19 | 10503723  |
| cg18205465 | 0.445624101 | 0.415150582 | 0.030473518  | 2.87E-05 | 0.084059122 | chr7  | 45026543  |
| cg01090686 | 0.650597144 | 0.670653742 | -0.020056598 | 2.88E-05 | 0.084059122 | chr12 | 133000028 |
| cg27362115 | 0.900680499 | 0.893724938 | 0.006955562  | 2.89E-05 | 0.084059122 | chr11 | 65172423  |
| cg08867267 | 0.748353177 | 0.771453616 | -0.023100439 | 2.90E-05 | 0.084059122 | chrX  | 130033963 |
| cg08757624 | 0.783982643 | 0.737026909 | 0.046955734  | 2.91E-05 | 0.084059122 | chr7  | 132677298 |
| cg23044178 | 0.912266759 | 0.930382445 | -0.018115686 | 2.92E-05 | 0.084059122 | chr11 | 12136405  |
| cg09956747 | 0.716516285 | 0.666355358 | 0.050160927  | 2.93E-05 | 0.084059122 | chr16 | 31538556  |
| cg18239858 | 0.825304109 | 0.843248467 | -0.017944358 | 2.95E-05 | 0.084059122 | chr7  | 101712363 |
| cg20944521 | 0.562304635 | 0.595401006 | -0.033096371 | 2.96E-05 | 0.084059122 | chr14 | 22218494  |
| cg13430777 | 0.821041192 | 0.839451756 | -0.018410564 | 3.05E-05 | 0.084059122 | chr12 | 8559701   |
| cg01766505 | 0.867024996 | 0.837413574 | 0.029611422  | 3.06E-05 | 0.084059122 | chr17 | 25679717  |
| cg14548038 | 0.790684192 | 0.762932443 | 0.027751749  | 3.08E-05 | 0.084059122 | chr9  | 140178418 |
| cg03012289 | 0.838256653 | 0.816471941 | 0.021784712  | 3.10E-05 | 0.084059122 | chr8  | 110374374 |
| cg24509398 | 0.632947386 | 0.594771596 | 0.03817579   | 3.10E-05 | 0.084059122 | chr1  | 28416532  |
| cg00124836 | 0.97345123  | 0.967776092 | 0.005675137  | 3.11E-05 | 0.084059122 | chr13 | 111295144 |
| cg10728179 | 0.783338096 | 0.803912657 | -0.020574561 | 3.13E-05 | 0.084059122 | chr3  | 124798370 |
| cg14334147 | 0.736571158 | 0.713784184 | 0.022786974  | 3.14E-05 | 0.084059122 | chrX  | 70291925  |
| cg09463656 | 0.300051547 | 0.34296842  | -0.042916873 | 3.15E-05 | 0.084059122 | chr17 | 13505751  |
| cg10342304 | 0.758145489 | 0.740930175 | 0.017215315  | 3.15E-05 | 0.084059122 | chr17 | 730170    |
| cg18050139 | 0.816330122 | 0.787891922 | 0.0284382    | 3.16E-05 | 0.084059122 | chr12 | 117099208 |
| cg24882220 | 0.804133267 | 0.776958574 | 0.027174693  | 3.16E-05 | 0.084059122 | chr8  | 130945857 |
| cg16657578 | 0.922691265 | 0.914217212 | 0.008474053  | 3.17E-05 | 0.084059122 | chr1  | 979589    |
| cg24341554 | 0.437439141 | 0.464550539 | -0.027111398 | 3.22E-05 | 0.084874506 | chr19 | 15591178  |
| cg02193513 | 0.625304144 | 0.581132014 | 0.044172131  | 3.27E-05 | 0.084912491 | chr4  | 57395012  |
| cg07990541 | 0.124024793 | 0.141774067 | -0.017749274 | 3.33E-05 | 0.084912491 | chr17 | 72744669  |
| cg15394350 | 0.060527911 | 0.070069415 | -0.009541504 | 3.34E-05 | 0.084912491 | chr1  | 92950257  |
| cg08411094 | 0.850284625 | 0.82422636  | 0.026058265  | 3.39E-05 | 0.084912491 | chr12 | 12916279  |
| cg16004439 | 0.857605816 | 0.837042149 | 0.020563667  | 3.40E-05 | 0.084912491 | chr4  | 165851186 |
| cg24027342 | 0.771403227 | 0.756671344 | 0.014731883  | 3.40E-05 | 0.084912491 | chr11 | 108131609 |
| cg00299070 | 0.807814929 | 0.769261442 | 0.038553487  | 3.41E-05 | 0.084912491 | chr1  | 237946534 |
| cg00086710 | 0.275087771 | 0.233517269 | 0.041570502  | 3.42E-05 | 0.084912491 | chr4  | 89204074  |
| cg03342862 | 0.79780593  | 0.811321767 | -0.013515837 | 3.42E-05 | 0.084912491 | chr1  | 163725217 |
| cg10256304 | 0.745993182 | 0.764679371 | -0.018686189 | 3.42E-05 | 0.084912491 | chr11 | 3497985   |
| cg08199235 | 0.74834047  | 0.780343825 | -0.032003354 | 3.44E-05 | 0.084912491 | chr2  | 131085606 |
| cg18013249 | 0.807940313 | 0.821074851 | -0.013134538 | 3.44E-05 | 0.084912491 | chr7  | 65961473  |
| cg10474284 | 0.789821018 | 0.771699153 | 0.018121865  | 3.49E-05 | 0.085319948 | chr13 | 95258374  |



|            |             |             |              |          |             |       |           |
|------------|-------------|-------------|--------------|----------|-------------|-------|-----------|
| cg18077418 | 0.57909044  | 0.603883011 | -0.024792571 | 3.52E-05 | 0.085319948 | chr4  | 6921774   |
| cg26668872 | 0.843506341 | 0.861000306 | -0.017493965 | 3.52E-05 | 0.085319948 | chr16 | 3546216   |
| cg13453288 | 0.730694016 | 0.707483047 | 0.023210969  | 3.55E-05 | 0.085319948 | chr1  | 53166996  |
| cg19145584 | 0.693181942 | 0.712141084 | -0.018959142 | 3.58E-05 | 0.085319948 | chr7  | 65865556  |
| cg03728457 | 0.899706482 | 0.88897664  | 0.010729841  | 3.59E-05 | 0.085319948 | chr15 | 74619595  |
| cg10312190 | 0.82599479  | 0.840243318 | -0.014248529 | 3.59E-05 | 0.085319948 | chr11 | 67749846  |
| cg04791456 | 0.829337125 | 0.845947706 | -0.016610581 | 3.63E-05 | 0.085319948 | chr3  | 57505743  |
| cg16705229 | 0.860068663 | 0.832075913 | 0.02799275   | 3.63E-05 | 0.085319948 | chr6  | 30019131  |
| cg17916447 | 0.847425074 | 0.864983334 | -0.01755826  | 3.70E-05 | 0.086402161 | chr3  | 197356641 |
| cg12478793 | 0.782977954 | 0.761673813 | 0.021304141  | 3.75E-05 | 0.086402161 | chr19 | 37261338  |
| cg00333020 | 0.888956661 | 0.883114863 | 0.005841798  | 3.77E-05 | 0.086402161 | chr10 | 2932299   |
| cg14535019 | 0.700980511 | 0.719786788 | -0.018806276 | 3.79E-05 | 0.086402161 | chr4  | 129433853 |
| cg00395990 | 0.726873809 | 0.687104359 | 0.03976945   | 3.82E-05 | 0.086402161 | chr11 | 119054921 |
| cg23237765 | 0.66829615  | 0.593000547 | 0.075295603  | 3.82E-05 | 0.086402161 | chr7  | 921845    |
| cg11087438 | 0.796380638 | 0.814113439 | -0.017732802 | 3.84E-05 | 0.086402161 | chr17 | 18302510  |
| cg22118112 | 0.943997703 | 0.935691408 | 0.008306295  | 3.84E-05 | 0.086402161 | chr20 | 62657367  |
| cg15108752 | 0.908500864 | 0.91898491  | -0.010484046 | 3.86E-05 | 0.086402161 | chr10 | 12874253  |
| cg08523325 | 0.795695209 | 0.80682652  | -0.01113131  | 3.88E-05 | 0.086402161 | chr11 | 89901450  |
| cg08651894 | 0.793185172 | 0.806540627 | -0.013355455 | 3.88E-05 | 0.086402161 | chr1  | 154832235 |
| cg16987567 | 0.802796653 | 0.778753239 | 0.024043414  | 3.94E-05 | 0.087159598 | chr1  | 33790374  |
| cg08219459 | 0.834161492 | 0.80823318  | 0.025928311  | 3.97E-05 | 0.08754075  | chr16 | 68734735  |
| cg19831386 | 0.848348129 | 0.832409786 | 0.015938343  | 4.04E-05 | 0.088607006 | chr14 | 105235891 |
| cg03047400 | 0.705855971 | 0.678258132 | 0.027597839  | 4.14E-05 | 0.090418163 | chr14 | 73496407  |
| cg16976547 | 0.864363082 | 0.847459908 | 0.016903174  | 4.17E-05 | 0.090645626 | chr15 | 91433530  |
| cg05014842 | 0.887675012 | 0.872895781 | 0.014779232  | 4.27E-05 | 0.092231676 | chr2  | 239225457 |
| cg14028272 | 0.834228926 | 0.812118244 | 0.022110683  | 4.33E-05 | 0.093285351 | chr1  | 229533222 |
| cg00808730 | 0.170552541 | 0.194600382 | -0.024047841 | 4.37E-05 | 0.093509213 | chr14 | 93215038  |
| cg09561417 | 0.547098511 | 0.569709343 | -0.022610832 | 4.61E-05 | 0.097323425 | chr17 | 18223010  |
| cg17794261 | 0.114983969 | 0.125156923 | -0.010172954 | 4.62E-05 | 0.097323425 | chr16 | 30583759  |
| cg07728084 | 0.757667311 | 0.778301505 | -0.020634194 | 4.64E-05 | 0.097323425 | chr10 | 21683123  |
| cg10351617 | 0.868537265 | 0.861023173 | 0.007514092  | 4.68E-05 | 0.097323425 | chr21 | 47580738  |
| cg27190839 | 0.713263736 | 0.683598979 | 0.029664757  | 4.69E-05 | 0.097323425 | chr11 | 33097035  |
| cg01379207 | 0.765283043 | 0.781987954 | -0.016704912 | 4.71E-05 | 0.097323425 | chr11 | 127811604 |
| cg12886731 | 0.643299559 | 0.602468219 | 0.04083134   | 4.71E-05 | 0.097323425 | chr10 | 71074462  |
| cg21740507 | 0.632398615 | 0.600617574 | 0.031781041  | 4.71E-05 | 0.097323425 | chr2  | 237412985 |
| cg26018312 | 0.862315911 | 0.877679354 | -0.015363444 | 4.75E-05 | 0.097546865 | chrX  | 138529149 |
| cg14999726 | 0.851061895 | 0.866081587 | -0.015019692 | 4.78E-05 | 0.097892863 | chr17 | 31251090  |
| cg14152854 | 0.873356941 | 0.859377316 | 0.013979626  | 4.81E-05 | 0.09790196  | chr9  | 138983759 |
| cg26029736 | 0.264352965 | 0.317835861 | -0.053482897 | 4.85E-05 | 0.098043422 | chr2  | 105760375 |
| cg15365536 | 0.700912855 | 0.719575082 | -0.018662227 | 4.86E-05 | 0.098043422 | chr6  | 16266181  |
| cg21678396 | 0.938105995 | 0.945385953 | -0.007279958 | 4.88E-05 | 0.098043422 | chr12 | 133145052 |
| cg18633587 | 0.928934911 | 0.913213917 | 0.015720994  | 4.91E-05 | 0.09825211  | chr3  | 48016946  |
| cg07971743 | 0.665408143 | 0.683315102 | -0.01790696  | 4.95E-05 | 0.09825211  | chr6  | 169235842 |
| cg20738202 | 0.070588115 | 0.092772392 | -0.022184277 | 4.95E-05 | 0.09825211  | chr11 | 16759965  |
| cg17972930 | 0.827098831 | 0.86843777  | -0.04133894  | 4.99E-05 | 0.098589552 | chr15 | 50797795  |
| cg12798675 | 0.539475703 | 0.509273143 | 0.03020256   | 5.07E-05 | 0.099277506 | chr14 | 102171582 |
| cg13559773 | 0.803791447 | 0.786202258 | 0.017589189  | 5.09E-05 | 0.099277506 | chr19 | 48562267  |

|            |             |             |              |          |             |       |           |
|------------|-------------|-------------|--------------|----------|-------------|-------|-----------|
| cg08862181 | 0.715822068 | 0.69890355  | 0.016918518  | 5.13E-05 | 0.099277506 | chr17 | 10277045  |
| cg24924210 | 0.148856544 | 0.167689211 | -0.018832666 | 5.13E-05 | 0.099277506 | chr19 | 16683266  |
| cg03536022 | 0.815689344 | 0.769783416 | 0.045905928  | 5.17E-05 | 0.099277506 | chr6  | 29706879  |
| cg04400496 | 0.675192577 | 0.701479575 | -0.026286999 | 5.17E-05 | 0.099277506 | chr12 | 75057913  |
| cg18185028 | 0.727060694 | 0.704087809 | 0.022972884  | 5.18E-05 | 0.099277506 | chr3  | 154042079 |
| cg23906204 | 0.854982803 | 0.873503556 | -0.018520753 | 5.22E-05 | 0.099335577 | chr1  | 161110860 |
| cg21540970 | 0.333404245 | 0.366188911 | -0.032784666 | 5.23E-05 | 0.099335577 | chr2  | 20075083  |
| cg16815991 | 0.208191394 | 0.236673622 | -0.028482229 | 5.34E-05 | 0.100237176 | chr12 | 14133129  |
| cg01730032 | 0.777333885 | 0.757279348 | 0.020054537  | 5.35E-05 | 0.100237176 | chr4  | 135248255 |
| cg04630873 | 0.894049744 | 0.877555825 | 0.016493919  | 5.37E-05 | 0.100237176 | chr10 | 33171196  |
| cg02234734 | 0.88847767  | 0.877079004 | 0.011398666  | 5.38E-05 | 0.100237176 | chr1  | 44882329  |
| cg22313497 | 0.122395423 | 0.146144659 | -0.023749236 | 5.38E-05 | 0.100237176 | chr16 | 730927    |
| cg03251249 | 0.088632063 | 0.099124751 | -0.010492688 | 5.45E-05 | 0.100637777 | chr10 | 69645012  |
| cg01924711 | 0.929613211 | 0.920595461 | 0.00901775   | 5.46E-05 | 0.100637777 | chr7  | 86829809  |
| cg01409552 | 0.578516307 | 0.69965287  | -0.121136563 | 5.47E-05 | 0.100637777 | chr16 | 28830997  |
| cg12875892 | 0.126626335 | 0.142823235 | -0.0161969   | 5.49E-05 | 0.100637777 | chr1  | 236030587 |
| cg07217075 | 0.069075139 | 0.056349897 | 0.012725242  | 5.57E-05 | 0.101382394 | chr20 | 17511826  |
| cg20385970 | 0.575650483 | 0.605720771 | -0.030070288 | 5.58E-05 | 0.101382394 | chr15 | 25474668  |
| cg08460629 | 0.871243523 | 0.888489232 | -0.017245709 | 5.61E-05 | 0.101382394 | chr13 | 64315383  |
| cg15911493 | 0.477168159 | 0.501941381 | -0.024773222 | 5.62E-05 | 0.101382394 | chr14 | 31529383  |
| cg14941172 | 0.519590328 | 0.497168606 | 0.022421722  | 5.68E-05 | 0.102041824 | chr19 | 56733045  |
| cg07790826 | 0.266803438 | 0.229403672 | 0.037399766  | 5.76E-05 | 0.102964729 | chr11 | 70049435  |
| cg15422439 | 0.720777904 | 0.736304077 | -0.015526173 | 5.79E-05 | 0.10306306  | chr8  | 70549038  |
| cg13852536 | 0.76859097  | 0.779317018 | -0.010726048 | 5.84E-05 | 0.10306306  | chr9  | 32567045  |
| cg18045461 | 0.536432694 | 0.515585458 | 0.020847236  | 5.88E-05 | 0.10306306  | chr22 | 29601862  |
| cg10262775 | 0.896433491 | 0.884818487 | 0.011615004  | 5.94E-05 | 0.10306306  | chr17 | 293318    |
| cg04787785 | 0.150006109 | 0.134096594 | 0.015909515  | 5.95E-05 | 0.10306306  | chr16 | 19533038  |
| cg18155853 | 0.952494505 | 0.943841787 | 0.008652718  | 5.96E-05 | 0.10306306  | chr3  | 169540504 |
| cg27351837 | 0.181728154 | 0.200277414 | -0.01854926  | 5.96E-05 | 0.10306306  | chr15 | 92396247  |
| cg27047750 | 0.164877306 | 0.190692567 | -0.025815261 | 5.97E-05 | 0.10306306  | chr19 | 42365024  |
| cg05516986 | 0.098426404 | 0.107185967 | -0.008759563 | 5.98E-05 | 0.10306306  | chr7  | 158622474 |
| cg20187309 | 0.795701552 | 0.760116667 | 0.035584884  | 5.99E-05 | 0.10306306  | chr6  | 26535971  |
| cg12188830 | 0.076229624 | 0.063506107 | 0.012723517  | 6.05E-05 | 0.103199491 | chr3  | 57741926  |
| cg11123583 | 0.903413036 | 0.925691277 | -0.022278241 | 6.06E-05 | 0.103199491 | chr17 | 744766    |
| cg15831820 | 0.572071779 | 0.541421286 | 0.030650494  | 6.06E-05 | 0.103199491 | chr10 | 88214335  |
| cg09074938 | 0.910581812 | 0.897481943 | 0.013099869  | 6.08E-05 | 0.103199491 | chr8  | 144757347 |
| cg02978168 | 0.371236538 | 0.432609354 | -0.061372817 | 6.48E-05 | 0.109237214 | chr18 | 76695123  |
| cg17908719 | 0.373548024 | 0.394057166 | -0.020509142 | 6.49E-05 | 0.109237214 | chr3  | 170155556 |
| cg08441269 | 0.790749903 | 0.810827168 | -0.020077265 | 6.56E-05 | 0.109719883 | chr4  | 53815811  |
| cg13823366 | 0.800711872 | 0.820732298 | -0.020020426 | 6.57E-05 | 0.109719883 | chr17 | 6678929   |
| cg09822423 | 0.897153445 | 0.9098573   | -0.012703855 | 6.60E-05 | 0.109863328 | chr1  | 192509700 |
| cg27016609 | 0.51860203  | 0.541574985 | -0.022972955 | 6.73E-05 | 0.111431704 | chr2  | 48806774  |
| cg21218627 | 0.800116121 | 0.784313252 | 0.015802869  | 6.80E-05 | 0.111431704 | chr9  | 132999496 |
| cg12423473 | 0.965070433 | 0.957660641 | 0.007409792  | 6.82E-05 | 0.111431704 | chr15 | 45962135  |
| cg26614346 | 0.600612484 | 0.572494756 | 0.028117728  | 6.84E-05 | 0.111431704 | chr2  | 231085735 |
| cg09050761 | 0.764781239 | 0.720673652 | 0.044107586  | 6.85E-05 | 0.111431704 | chr8  | 17272669  |
| cg14275626 | 0.865979929 | 0.828321362 | 0.037658567  | 6.87E-05 | 0.111431704 | chr9  | 135549588 |

|                |             |             |              |          |             |       |           |
|----------------|-------------|-------------|--------------|----------|-------------|-------|-----------|
| cg22624255     | 0.151401705 | 0.181236881 | -0.029835176 | 6.87E-05 | 0.111431704 | chr19 | 19779476  |
| cg10233416     | 0.925096194 | 0.915175692 | 0.009920502  | 6.89E-05 | 0.111431704 | chr6  | 36414541  |
| ch.10.2810236F | 0.086571422 | 0.098740079 | -0.012168657 | 6.96E-05 | 0.111885981 | chr10 | 130385987 |
| cg02842869     | 0.766190651 | 0.785302396 | -0.019111745 | 6.98E-05 | 0.111885981 | chr17 | 79921131  |
| cg25100475     | 0.827104827 | 0.846560076 | -0.019455249 | 6.99E-05 | 0.111885981 | chr1  | 227750970 |
| cg24163448     | 0.671811262 | 0.622587124 | 0.049224138  | 7.04E-05 | 0.112278447 | chr9  | 79013444  |
| cg08119506     | 0.777809768 | 0.790953181 | -0.013143413 | 7.09E-05 | 0.112291486 | chr8  | 117309811 |
| cg26887757     | 0.857030235 | 0.840077233 | 0.016953002  | 7.09E-05 | 0.112291486 | chr16 | 70331777  |
| cg12682872     | 0.890731453 | 0.904272209 | -0.013540756 | 7.13E-05 | 0.112291486 | chr6  | 32919427  |
| cg21276022     | 0.718628088 | 0.688328845 | 0.030299243  | 7.14E-05 | 0.112291486 | chr9  | 136390236 |
| cg22232695     | 0.772913078 | 0.742240786 | 0.030672292  | 7.18E-05 | 0.112412968 | chr19 | 36156356  |
| cg11662609     | 0.869479457 | 0.856380687 | 0.01309877   | 7.19E-05 | 0.112412968 | chr10 | 5935006   |
| cg11532725     | 0.818237382 | 0.791738472 | 0.02649891   | 7.26E-05 | 0.112748195 | chr2  | 56407143  |
| cg00711000     | 0.113032405 | 0.126002813 | -0.012970408 | 7.28E-05 | 0.112748195 | chr2  | 36824663  |
| cg22699314     | 0.680829394 | 0.713626846 | -0.032797452 | 7.29E-05 | 0.112748195 | chr2  | 61847725  |
| cg08407553     | 0.775977534 | 0.75524435  | 0.020733184  | 7.40E-05 | 0.113837378 | chrX  | 70587800  |
| cg00171942     | 0.77500991  | 0.740914358 | 0.034095551  | 7.44E-05 | 0.113837378 | chr1  | 34088611  |
| cg09447450     | 0.810683801 | 0.824722875 | -0.014039073 | 7.45E-05 | 0.113837378 | chr6  | 40563644  |
| cg05413325     | 0.876038742 | 0.870034873 | 0.006003869  | 7.46E-05 | 0.113837378 | chr8  | 1397936   |
| cg09441501     | 0.06167644  | 0.080520804 | -0.018844364 | 7.55E-05 | 0.114581258 | chr11 | 798350    |
| cg06924976     | 0.142661736 | 0.15538222  | -0.012720483 | 7.56E-05 | 0.114581258 | chr4  | 41753749  |
| cg02793656     | 0.919143816 | 0.909575385 | 0.009568431  | 7.61E-05 | 0.114581258 | chr15 | 26869667  |
| cg08047457     | 0.079202261 | 0.086825741 | -0.00762348  | 7.64E-05 | 0.114581258 | chr3  | 50378413  |
| cg21769114     | 0.076409562 | 0.085311985 | -0.008902423 | 7.64E-05 | 0.114581258 | chr3  | 32726526  |
| cg06517813     | 0.641070603 | 0.688647356 | -0.047576753 | 7.66E-05 | 0.114581258 | chr1  | 198553499 |
| cg24037243     | 0.236332732 | 0.269391738 | -0.033059007 | 7.69E-05 | 0.114581258 | chr17 | 8534057   |
| cg20568408     | 0.601175688 | 0.617373833 | -0.016198145 | 7.83E-05 | 0.115744307 | chr14 | 90425050  |
| cg05055833     | 0.796595094 | 0.830636407 | -0.034041312 | 7.84E-05 | 0.115744307 | chr15 | 25459305  |
| cg10464462     | 0.06141317  | 0.081253854 | -0.019840684 | 7.84E-05 | 0.115744307 | chr17 | 33417059  |
| cg26529556     | 0.143626085 | 0.158114559 | -0.014488474 | 7.86E-05 | 0.115744307 | chr17 | 62223225  |
| cg15028479     | 0.748919269 | 0.768558512 | -0.019639244 | 7.91E-05 | 0.115834639 | chr1  | 238081782 |
| cg10151248     | 0.868342878 | 0.855010644 | 0.013332234  | 7.92E-05 | 0.115834639 | chr11 | 66639567  |
| cg24850331     | 0.059936553 | 0.048043456 | 0.011893096  | 7.96E-05 | 0.115891735 | chr12 | 70132987  |
| cg12315011     | 0.564403847 | 0.589589613 | -0.025185766 | 7.98E-05 | 0.115891735 | chr4  | 161047106 |
| cg17696406     | 0.802748143 | 0.816605913 | -0.01385777  | 8.01E-05 | 0.116053174 | chr3  | 61421175  |
| cg03325407     | 0.717874697 | 0.692607567 | 0.02526713   | 8.08E-05 | 0.116513683 | chr1  | 114423726 |
| cg17768026     | 0.823260587 | 0.800390228 | 0.022870359  | 8.23E-05 | 0.116513683 | chr6  | 137140006 |
| cg11918172     | 0.681448091 | 0.702107408 | -0.020659317 | 8.24E-05 | 0.116513683 | chr2  | 104914351 |
| cg19282068     | 0.744951226 | 0.763311806 | -0.01836058  | 8.24E-05 | 0.116513683 | chr4  | 3899446   |
| cg15990211     | 0.084574502 | 0.095523564 | -0.010949063 | 8.25E-05 | 0.116513683 | chr14 | 65290093  |
| cg18499294     | 0.798822721 | 0.777403351 | 0.02141937   | 8.26E-05 | 0.116513683 | chr14 | 55072950  |
| cg09261992     | 0.801842012 | 0.775209271 | 0.026632741  | 8.27E-05 | 0.116513683 | chr1  | 31510528  |
| cg24431909     | 0.077276749 | 0.089591629 | -0.012314881 | 8.27E-05 | 0.116513683 | chr19 | 13030239  |
| cg06703635     | 0.756449223 | 0.782676674 | -0.026227451 | 8.28E-05 | 0.116513683 | chr1  | 201488410 |
| cg07085310     | 0.840353074 | 0.858732632 | -0.018379558 | 8.30E-05 | 0.116513683 | chr3  | 44752404  |
| cg11393407     | 0.901359806 | 0.889967646 | 0.011392161  | 8.38E-05 | 0.11724415  | chr17 | 17717239  |
| cg02780400     | 0.754443422 | 0.725764543 | 0.028678879  | 8.60E-05 | 0.119939573 | chr10 | 43187469  |



|            |             |             |              |             |             |       |           |
|------------|-------------|-------------|--------------|-------------|-------------|-------|-----------|
| cg27070729 | 0.892732458 | 0.874352017 | 0.018380441  | 8.63E-05    | 0.119939573 | chr16 | 28964954  |
| cg11722990 | 0.832493352 | 0.810137873 | 0.022355479  | 8.66E-05    | 0.119939573 | chr13 | 96984206  |
| cg19462712 | 0.809170321 | 0.82042916  | -0.011258839 | 8.68E-05    | 0.119939573 | chr19 | 34744703  |
| cg23397147 | 0.67223493  | 0.628868269 | 0.043366662  | 8.70E-05    | 0.119939573 | chr17 | 4063598   |
| cg23088403 | 0.846300464 | 0.834523912 | 0.011776552  | 8.78E-05    | 0.120613244 | chr7  | 56434239  |
| cg10550471 | 0.714036243 | 0.68483885  | 0.029197393  | 8.82E-05    | 0.120810942 | chr7  | 156239550 |
| cg08983966 | 0.942715576 | 0.934048275 | 0.008667301  | 8.88E-05    | 0.121295777 | chr17 | 76798273  |
| cg25922355 | 0.661013909 | 0.645082097 | 0.015931812  | 8.94E-05    | 0.121392452 | chr7  | 75830799  |
| cg06919490 | 0.122102365 | 0.139903008 | -0.017800642 | 8.95E-05    | 0.121392452 | chr4  | 166034313 |
| cg03369671 | 0.108919439 | 0.12435461  | -0.015435171 | 8.99E-05    | 0.121392452 | chr2  | 232063176 |
| cg21827031 | 0.234856198 | 0.262827636 | -0.027971438 | 9.03E-05    | 0.121392452 | chr11 | 46958255  |
| cg18612204 | 0.191112101 | 0.220258294 | -0.029146193 | 9.04E-05    | 0.121392452 | chr15 | 65204146  |
| cg24400553 | 0.792796419 | 0.7782818   | 0.014514619  | 9.05E-05    | 0.121392452 | chr19 | 1886629   |
| cg01372694 | 0.585084406 | 0.601981449 | -0.016897043 | 9.07E-05    | 0.12140893  | chr7  | 65878352  |
| cg05233128 | 0.932969933 | 0.928855312 | 0.004114621  | 9.28E-05    | 0.12357485  | chr19 | 3659669   |
| cg08351269 | 0.819401254 | 0.802177059 | 0.017224195  | 9.29E-05    | 0.12357485  | chr5  | 108674169 |
| cg20183778 | 0.044424028 | 0.035409146 | 0.009014882  | 9.34E-05    | 0.123605033 | chr7  | 102105344 |
| cg23841538 | 0.685059982 | 0.703126857 | -0.018066875 | 9.35E-05    | 0.123605033 | chr2  | 206804487 |
| cg21787873 | 0.648987437 | 0.673313298 | -0.024325861 | 9.43E-05    | 0.124312224 | chr1  | 23276711  |
| cg01870247 | 0.84351366  | 0.816736913 | 0.026776747  | 9.49E-05    | 0.124729121 | chr20 | 31354127  |
| cg13525458 | 0.15277479  | 0.169482191 | -0.016707401 | 9.62E-05    | 0.126006714 | chr20 | 44486289  |
| cg19727641 | 0.159647817 | 0.132406515 | 0.027241302  | 9.66E-05    | 0.126006714 | chr3  | 138067606 |
| cg09541468 | 0.081697249 | 0.093975914 | -0.012278665 | 9.67E-05    | 0.126006714 | chr11 | 67211245  |
| cg05305025 | 0.096664576 | 0.111789623 | -0.015125047 | 9.78E-05    | 0.126177178 | chr18 | 20513713  |
| cg18611122 | 0.238062088 | 0.269587911 | -0.031525823 | 9.79E-05    | 0.126177178 | chr1  | 150947896 |
| cg24933247 | 0.067423658 | 0.088235361 | -0.020811703 | 9.82E-05    | 0.126177178 | chr19 | 19729558  |
| cg19631346 | 0.822769469 | 0.838855141 | -0.016085672 | 9.85E-05    | 0.126177178 | chr19 | 22699252  |
| cg23627475 | 0.580030738 | 0.610229102 | -0.030198364 | 9.85E-05    | 0.126177178 | chr2  | 216180626 |
| cg27089675 | 0.364287029 | 0.40298956  | -0.038702531 | 9.86E-05    | 0.126177178 | chr10 | 123838499 |
| cg13976866 | 0.571105623 | 0.582139761 | -0.011034138 | 9.90E-05    | 0.126177178 | chr7  | 128696069 |
| cg09439010 | 0.555537843 | 0.579641896 | -0.024104053 | 9.91E-05    | 0.126177178 | chr4  | 55852467  |
| cg10907356 | 0.683194137 | 0.705445627 | -0.02225149  | 9.93E-05    | 0.126177178 | chr2  | 17830694  |
| cg22866835 | 0.116068155 | 0.097137872 | 0.018930283  | 0.000100833 | 0.127467674 | chr10 | 35931235  |
| cg26336773 | 0.831994323 | 0.84476837  | -0.012774047 | 0.000100861 | 0.127467674 | chr1  | 175014805 |
| cg11019069 | 0.822228465 | 0.806264006 | 0.015964459  | 0.00010202  | 0.12857553  | chr6  | 28551028  |
| cg24469803 | 0.10364012  | 0.121052831 | -0.017412712 | 0.000103298 | 0.128699513 | chr10 | 79789416  |
| cg25320665 | 0.862247403 | 0.875981162 | -0.013733759 | 0.000104023 | 0.128699513 | chr11 | 102668176 |
| cg11867686 | 0.276449478 | 0.240845332 | 0.035604147  | 0.000104264 | 0.128699513 | chr11 | 67169368  |
| cg24029994 | 0.900955886 | 0.894616139 | 0.006339747  | 0.000104612 | 0.128699513 | chr11 | 1471410   |
| cg25597531 | 0.955528639 | 0.963880064 | -0.008351425 | 0.000104664 | 0.128699513 | chr8  | 54507339  |
| cg08699341 | 0.903631067 | 0.890109187 | 0.01352188   | 0.000105176 | 0.128699513 | chr13 | 114193224 |
| cg27166452 | 0.875761427 | 0.859530598 | 0.016230829  | 0.000105263 | 0.128699513 | chr6  | 116592422 |
| cg10504606 | 0.551496943 | 0.583711438 | -0.032214494 | 0.000105427 | 0.128699513 | chr17 | 8464766   |
| cg01044580 | 0.917680289 | 0.905649643 | 0.012030646  | 0.000105832 | 0.128699513 | chr14 | 21900820  |
| cg06708683 | 0.753170924 | 0.714550443 | 0.038620481  | 0.000105925 | 0.128699513 | chr17 | 42782472  |
| cg16466278 | 0.678923147 | 0.704084328 | -0.025161181 | 0.000106146 | 0.128699513 | chr15 | 43429893  |
| cg07441122 | 0.733156566 | 0.692278873 | 0.040877693  | 0.000106236 | 0.128699513 | chr16 | 46824519  |

|            |             |             |              |             |             |       |           |
|------------|-------------|-------------|--------------|-------------|-------------|-------|-----------|
| cg26737330 | 0.876772818 | 0.898818371 | -0.022045552 | 0.000107283 | 0.128699513 | chr4  | 71200323  |
| cg12518259 | 0.741883194 | 0.767687611 | -0.025804417 | 0.000107413 | 0.128699513 | chrX  | 100668953 |
| cg18437365 | 0.450230945 | 0.42082233  | 0.029408615  | 0.000107425 | 0.128699513 | chr13 | 112717484 |
| cg09791009 | 0.568420683 | 0.608488405 | -0.040067722 | 0.000107523 | 0.128699513 | chr12 | 73034008  |
| cg04514834 | 0.783260648 | 0.803181656 | -0.019921008 | 0.000107766 | 0.128699513 | chr5  | 117084231 |
| cg15477139 | 0.509726998 | 0.533730423 | -0.024003425 | 0.000107996 | 0.128699513 | chr15 | 25223633  |
| cg11545863 | 0.79626493  | 0.777873188 | 0.018391742  | 0.000108107 | 0.128699513 | chr10 | 102487168 |
| cg11126351 | 0.892654672 | 0.880726399 | 0.011928273  | 0.000108153 | 0.128699513 | chr14 | 35594356  |
| cg24985372 | 0.553590377 | 0.593840524 | -0.040250147 | 0.000108286 | 0.128699513 | chr2  | 130741520 |
| cg11415852 | 0.831114084 | 0.812166549 | 0.018947535  | 0.000108731 | 0.128699513 | chr10 | 97201765  |
| cg13883186 | 0.907982637 | 0.920032249 | -0.012049612 | 0.000108774 | 0.128699513 | chr7  | 142333186 |
| cg01186613 | 0.912326746 | 0.898323971 | 0.014002776  | 0.000109012 | 0.128699513 | chr2  | 44065003  |
| cg02391555 | 0.795502492 | 0.776999988 | 0.018502504  | 0.000109171 | 0.128699513 | chr16 | 22016152  |
| cg14847236 | 0.941374545 | 0.946264375 | -0.004889831 | 0.000110503 | 0.12993494  | chr4  | 1656956   |
| cg16736181 | 0.596615876 | 0.615899824 | -0.019283948 | 0.000111102 | 0.130303374 | chr10 | 2249818   |
| cg01795660 | 0.746307621 | 0.73074779  | 0.015559831  | 0.000112387 | 0.131309559 | chr16 | 30024074  |
| cg18720905 | 0.080517206 | 0.087728414 | -0.007211208 | 0.000113169 | 0.131309559 | chr2  | 96990858  |
| cg24102266 | 0.104938535 | 0.118628902 | -0.013690367 | 0.000113642 | 0.131309559 | chr1  | 33219584  |
| cg15703426 | 0.823143874 | 0.800941579 | 0.022202295  | 0.000113857 | 0.131309559 | chr6  | 14409427  |
| cg26505691 | 0.041717454 | 0.031357523 | 0.010359931  | 0.000113925 | 0.131309559 | chr16 | 27461333  |
| cg24517611 | 0.751476069 | 0.731739377 | 0.019736692  | 0.000114083 | 0.131309559 | chr17 | 73203081  |
| cg18114913 | 0.726488873 | 0.746578929 | -0.020090056 | 0.000114138 | 0.131309559 | chr6  | 167738342 |
| cg16508522 | 0.784277349 | 0.805463565 | -0.021186216 | 0.000114263 | 0.131309559 | chr3  | 141319423 |
| cg00597801 | 0.089675813 | 0.102440205 | -0.012764392 | 0.000115022 | 0.131690453 | chr4  | 109092918 |
| cg05965444 | 0.607021453 | 0.588445083 | 0.01857637   | 0.000115171 | 0.131690453 | chrX  | 134049328 |
| cg24345747 | 0.610903808 | 0.643236072 | -0.032332265 | 0.000116449 | 0.132584494 | chr2  | 87015813  |
| cg02238950 | 0.610504303 | 0.625991187 | -0.015486883 | 0.000116535 | 0.132584494 | chr17 | 1505303   |
| cg16006841 | 0.694710434 | 0.502286769 | 0.192423665  | 0.000118073 | 0.134000963 | chr5  | 176797999 |
| cg11625382 | 0.881817397 | 0.86112666  | 0.020690737  | 0.00011853  | 0.134053681 | chr10 | 3098271   |
| cg27298394 | 0.871801047 | 0.885881242 | -0.014080195 | 0.000118725 | 0.134053681 | chr6  | 23854222  |
| cg03338185 | 0.67677363  | 0.632841965 | 0.043931665  | 0.000119023 | 0.134053681 | chr1  | 16304821  |
| cg20058389 | 0.858224684 | 0.865683866 | -0.007459182 | 0.000119295 | 0.134053681 | chr2  | 196412552 |
| cg14331148 | 0.151109309 | 0.175595578 | -0.024486269 | 0.000120163 | 0.13451832  | chr19 | 47551893  |
| cg11120049 | 0.742880932 | 0.708241466 | 0.034639466  | 0.000120438 | 0.13451832  | chr14 | 78104508  |
| cg08938155 | 0.719084977 | 0.66165002  | 0.057434957  | 0.000120593 | 0.13451832  | chr5  | 77043612  |
| cg17002428 | 0.690481683 | 0.659765813 | 0.03071587   | 0.00012238  | 0.136178225 | chr1  | 3778271   |
| cg18075930 | 0.723454725 | 0.742153235 | -0.01869851  | 0.000123149 | 0.136700634 | chr7  | 30615805  |
| cg14502625 | 0.277386247 | 0.306820951 | -0.029434704 | 0.000123569 | 0.136834533 | chr5  | 33162283  |
| cg07990395 | 0.689674685 | 0.708622708 | -0.018948022 | 0.000124244 | 0.137247967 | chrX  | 138287169 |
| cg03847896 | 0.616663461 | 0.567293149 | 0.049370312  | 0.000127    | 0.139657591 | chr1  | 112154295 |
| cg16709512 | 0.862247887 | 0.871529312 | -0.009281425 | 0.000127349 | 0.139657591 | chr5  | 101297174 |
| cg06223797 | 0.852872314 | 0.83772026  | 0.015152055  | 0.000128087 | 0.139657591 | chr12 | 95644358  |
| cg24539380 | 0.845702148 | 0.831417999 | 0.014284149  | 0.000128382 | 0.139657591 | chr17 | 36896750  |
| cg21651356 | 0.732738326 | 0.717552742 | 0.015185584  | 0.000128602 | 0.139657591 | chr12 | 104685539 |
| cg14530856 | 0.894022296 | 0.878665453 | 0.015356843  | 0.000128879 | 0.139657591 | chr10 | 778073    |
| cg10162673 | 0.069091466 | 0.07787746  | -0.008785994 | 0.000129029 | 0.139657591 | chr3  | 128598689 |
| cg17610333 | 0.169580982 | 0.254126678 | -0.084545695 | 0.000129385 | 0.139657591 | chr6  | 168107313 |

|                |             |             |              |             |             |       |           |
|----------------|-------------|-------------|--------------|-------------|-------------|-------|-----------|
| cg20844692     | 0.216780498 | 0.253280059 | -0.036499561 | 0.000129469 | 0.139657591 | chr3  | 196230657 |
| cg06819813     | 0.52928037  | 0.557530524 | -0.028250154 | 0.000129486 | 0.139657591 | chr15 | 25471851  |
| cg08962798     | 0.508121978 | 0.529435872 | -0.021313894 | 0.00012994  | 0.139816242 | chr5  | 179106333 |
| cg08047886     | 0.157354922 | 0.183794711 | -0.026439789 | 0.000131238 | 0.140811189 | chr11 | 57425128  |
| cg11964474     | 0.769144961 | 0.756355764 | 0.012789197  | 0.000131853 | 0.140811189 | chr17 | 41278655  |
| cg08856378     | 0.748675917 | 0.767389851 | -0.018713934 | 0.000132    | 0.140811189 | chr17 | 560590    |
| cg01084918     | 0.524504766 | 0.545080816 | -0.02057605  | 0.000132099 | 0.140811189 | chr1  | 110576366 |
| cg02150077     | 0.611809663 | 0.573189802 | 0.038619861  | 0.000132536 | 0.140947978 | chr16 | 87098542  |
| cg07917842     | 0.5242867   | 0.536984348 | -0.012697648 | 0.000133135 | 0.141256087 | chr17 | 29672644  |
| cg19890858     | 0.146138331 | 0.171287258 | -0.025148926 | 0.000134216 | 0.141478559 | chr22 | 50624742  |
| cg02545885     | 0.867459065 | 0.850378947 | 0.017080118  | 0.000134261 | 0.141478559 | chr20 | 16707078  |
| cg04730276     | 0.872436208 | 0.848349126 | 0.024087083  | 0.000134275 | 0.141478559 | chr2  | 228586426 |
| cg13118072     | 0.186077959 | 0.158350967 | 0.027726992  | 0.000134676 | 0.141573984 | chr6  | 30181194  |
| cg17686236     | 0.788557574 | 0.750290488 | 0.038267086  | 0.000135893 | 0.142524501 | chr7  | 6444640   |
| cg09102864     | 0.12339755  | 0.136745471 | -0.01334792  | 0.000136417 | 0.142746129 | chr11 | 68780892  |
| cg02483910     | 0.865396521 | 0.851710252 | 0.013686268  | 0.000137789 | 0.143851875 | chr7  | 66055597  |
| cg25228995     | 0.895665545 | 0.885349918 | 0.010315627  | 0.000138818 | 0.144595356 | chr5  | 139260468 |
| cg09796583     | 0.741315641 | 0.715258958 | 0.026056683  | 0.000139185 | 0.144647348 | chr10 | 73156647  |
| cg18042586     | 0.607949601 | 0.58949862  | 0.018450981  | 0.000139899 | 0.144833229 | chr8  | 22288224  |
| cg10124011     | 0.845958163 | 0.830640092 | 0.015318071  | 0.000140095 | 0.144833229 | chr1  | 1574521   |
| cg12295617     | 0.10932344  | 0.119619923 | -0.010296483 | 0.000140502 | 0.144833229 | chr8  | 22526663  |
| cg26891211     | 0.832914451 | 0.774483673 | 0.058430778  | 0.000140634 | 0.144833229 | chr16 | 17931006  |
| cg20827193     | 0.085598379 | 0.09499873  | -0.009400352 | 0.000141249 | 0.145139318 | chr1  | 109969084 |
| cg12610079     | 0.598825508 | 0.622017193 | -0.023191684 | 0.000142567 | 0.145857777 | chr1  | 162838809 |
| ch.12.2583928F | 0.202137293 | 0.214616233 | -0.01247894  | 0.000142588 | 0.145857777 | chr12 | 123160012 |
| cg00766964     | 0.820865998 | 0.799697434 | 0.021168564  | 0.000143551 | 0.146432468 | chr13 | 24693844  |
| cg07403638     | 0.168315978 | 0.14710605  | 0.021209928  | 0.000143965 | 0.146432468 | chr18 | 32870369  |
| cg02023042     | 0.55577807  | 0.538433215 | 0.017344855  | 0.000144112 | 0.146432468 | chr7  | 92220071  |
| cg06311795     | 0.675203836 | 0.699071213 | -0.023867376 | 0.000144846 | 0.146770605 | chr12 | 130818957 |
| cg17303578     | 0.769558609 | 0.739459911 | 0.030098699  | 0.000145089 | 0.146770605 | chr5  | 128303903 |
| cg08877035     | 0.118460829 | 0.132866369 | -0.01440554  | 0.000145826 | 0.147190605 | chr12 | 62829123  |
| cg02137691     | 0.786803165 | 0.769047429 | 0.017755736  | 0.000146596 | 0.147640778 | chr4  | 1805671   |
| cg08740309     | 0.807201403 | 0.793148042 | 0.014053361  | 0.000148372 | 0.14770583  | chr11 | 8891157   |
| cg02980650     | 0.781831378 | 0.807364633 | -0.025533255 | 0.000148412 | 0.14770583  | chr10 | 7446012   |
| cg27234786     | 0.363513656 | 0.398382883 | -0.034869226 | 0.000148528 | 0.14770583  | chr1  | 204381404 |
| cg14560311     | 0.082517869 | 0.061330632 | 0.021187237  | 0.000148678 | 0.14770583  | chr15 | 34517239  |
| cg25215117     | 0.889788482 | 0.880312627 | 0.009475855  | 0.000148704 | 0.14770583  | chr17 | 11461665  |
| cg21613620     | 0.904841096 | 0.92293266  | -0.018091565 | 0.000148775 | 0.14770583  | chr13 | 97927242  |
| cg17384105     | 0.82733937  | 0.794912807 | 0.032426563  | 0.000148927 | 0.14770583  | chr6  | 32126949  |
| cg04471375     | 0.663290583 | 0.696466498 | -0.033175915 | 0.000149966 | 0.147996682 | chr16 | 58752165  |
| cg24688909     | 0.879495475 | 0.884911809 | -0.005416334 | 0.000150017 | 0.147996682 | chr22 | 47059079  |
| cg02567751     | 0.841618302 | 0.825403011 | 0.016215292  | 0.000150193 | 0.147996682 | chr6  | 39521911  |
| cg18193219     | 0.121534965 | 0.137751682 | -0.016216717 | 0.000151692 | 0.148665941 | chr3  | 53164697  |
| cg26371226     | 0.883921562 | 0.869560064 | 0.014361498  | 0.000151774 | 0.148665941 | chr6  | 4259185   |
| ch.10.645342R  | 0.17644751  | 0.189977897 | -0.013530387 | 0.00015185  | 0.148665941 | chr10 | 24771691  |
| cg12819931     | 0.710822312 | 0.737801063 | -0.026978751 | 0.000152718 | 0.149195647 | chr10 | 30663455  |
| cg03392960     | 0.602166487 | 0.620989139 | -0.018822652 | 0.000153288 | 0.149432641 | chr8  | 49823140  |

|            |             |             |              |             |             |       |           |
|------------|-------------|-------------|--------------|-------------|-------------|-------|-----------|
| cg02058552 | 0.092269622 | 0.109420374 | -0.017150752 | 0.000153922 | 0.149633555 | chr10 | 5454564   |
| cg19564098 | 0.192191867 | 0.160990843 | 0.031201024  | 0.0001543   | 0.149633555 | chr10 | 124895697 |
| cg19811863 | 0.689577595 | 0.650304816 | 0.03927278   | 0.000154478 | 0.149633555 | chr6  | 32785740  |
| cg26909817 | 0.856706383 | 0.843389995 | 0.013316388  | 0.000155377 | 0.149781659 | chr16 | 53218077  |
| cg22888850 | 0.828799411 | 0.84479778  | -0.015998369 | 0.000155619 | 0.149781659 | chr13 | 53536706  |
| cg24636244 | 0.634037866 | 0.604155345 | 0.02988252   | 0.000155913 | 0.149781659 | chr10 | 6221185   |
| cg13587495 | 0.805743938 | 0.790993702 | 0.014750236  | 0.000155944 | 0.149781659 | chr3  | 89449406  |
| cg09597390 | 0.683269913 | 0.649321859 | 0.033948054  | 0.000156663 | 0.15015561  | chr11 | 7436013   |
| cg22025570 | 0.897635118 | 0.906022876 | -0.008387758 | 0.00015736  | 0.150179657 | chr1  | 4832352   |
| cg20818191 | 0.838732359 | 0.818317993 | 0.020414366  | 0.000157362 | 0.150179657 | chr4  | 866154    |
| cg23463205 | 0.733030488 | 0.749422613 | -0.016392125 | 0.000157676 | 0.150179657 | chr10 | 118305444 |
| cg13386839 | 0.90556905  | 0.891733264 | 0.013835786  | 0.000158622 | 0.150766307 | chr1  | 12250343  |
| cg10945855 | 0.312751417 | 0.365151347 | -0.05239993  | 0.00015941  | 0.151200621 | chr7  | 63085215  |
| cg17734983 | 0.5824649   | 0.598298298 | -0.015833398 | 0.000159796 | 0.151251769 | chr15 | 25456897  |
| cg21884905 | 0.117271823 | 0.131580712 | -0.014308889 | 0.000160375 | 0.151485845 | chr8  | 144511672 |
| cg23191740 | 0.765612353 | 0.726225346 | 0.039387007  | 0.000160821 | 0.151592741 | chr21 | 46694944  |
| cg22293261 | 0.929911373 | 0.916676505 | 0.013234868  | 0.00016296  | 0.152765778 | chr17 | 79958141  |
| cg14480943 | 0.762303882 | 0.741178481 | 0.021125401  | 0.000162995 | 0.152765778 | chr3  | 20589760  |
| cg06828282 | 0.857167122 | 0.84037031  | 0.016796813  | 0.000163141 | 0.152765778 | chr11 | 47151756  |
| cg20133000 | 0.094741519 | 0.107555837 | -0.012814317 | 0.000163575 | 0.152765778 | chr6  | 28219778  |
| cg18617958 | 0.683289116 | 0.706833365 | -0.023544248 | 0.000163739 | 0.152765778 | chr2  | 192560369 |
| cg26392005 | 0.092113594 | 0.083055369 | 0.009058225  | 0.000164415 | 0.153083405 | chr14 | 81421297  |
| cg09900527 | 0.858250309 | 0.871373036 | -0.013122726 | 0.000166067 | 0.15430649  | chr5  | 179859512 |
| cg17269581 | 0.716038515 | 0.734116767 | -0.018078252 | 0.000166418 | 0.154318762 | chr17 | 16876375  |
| cg11741432 | 0.641686326 | 0.604410007 | 0.037276319  | 0.000167929 | 0.155403626 | chr17 | 4696249   |
| cg02007235 | 0.614042866 | 0.629691762 | -0.015648897 | 0.00016893  | 0.156013677 | chr6  | 30568139  |
| cg11185653 | 0.169855693 | 0.192996794 | -0.023141102 | 0.000170288 | 0.156496769 | chr14 | 105669480 |
| cg09907183 | 0.774652725 | 0.791565396 | -0.016912671 | 0.000170428 | 0.156496769 | chr5  | 7273025   |
| cg03334425 | 0.202852111 | 0.188094273 | 0.014757839  | 0.000170482 | 0.156496769 | chr16 | 21675455  |
| cg13608034 | 0.90706591  | 0.890100317 | 0.016965593  | 0.000172025 | 0.157595996 | chr9  | 134762160 |
| cg26406407 | 0.765865887 | 0.747635784 | 0.018230103  | 0.000173664 | 0.15846878  | chr10 | 438229    |
| cg22048274 | 0.681178848 | 0.657893341 | 0.023285508  | 0.000173673 | 0.15846878  | chr6  | 31853428  |
| cg13262159 | 0.879620757 | 0.88537587  | -0.005755113 | 0.000174962 | 0.159326972 | chr11 | 71230303  |
| cg10814135 | 0.222268675 | 0.203209375 | 0.0190593    | 0.000176043 | 0.159671598 | chr17 | 79935032  |
| cg08460717 | 0.910332156 | 0.897755743 | 0.012576413  | 0.000176057 | 0.159671598 | chr6  | 33149789  |
| cg01976034 | 0.784767593 | 0.808024864 | -0.023257272 | 0.000176562 | 0.159671598 | chr3  | 57313955  |
| cg25818915 | 0.732616599 | 0.744241549 | -0.01162495  | 0.000176741 | 0.159671598 | chrX  | 110863969 |
| cg11537946 | 0.194281698 | 0.216167417 | -0.021885719 | 0.000177447 | 0.159992959 | chr4  | 139773369 |
| cg18664773 | 0.088610544 | 0.076220744 | 0.0123898    | 0.000178154 | 0.160030382 | chr19 | 59085049  |
| cg07437360 | 0.59865481  | 0.629449061 | -0.030794251 | 0.00017819  | 0.160030382 | chr11 | 130413263 |
| cg25719374 | 0.554195797 | 0.532995392 | 0.021200405  | 0.000178893 | 0.1602277   | chr19 | 3930244   |
| cg25420132 | 0.473661644 | 0.509697134 | -0.03603549  | 0.000179203 | 0.1602277   | chr6  | 21762391  |
| cg06989693 | 0.644647691 | 0.669253756 | -0.024606065 | 0.000179669 | 0.1602277   | chr5  | 41409354  |
| cg26429022 | 0.578434859 | 0.527063127 | 0.051371732  | 0.000179815 | 0.1602277   | chr7  | 5186528   |
| cg27212541 | 0.366319522 | 0.411987426 | -0.045667905 | 0.000180331 | 0.160374261 | chr3  | 49507385  |
| cg23259384 | 0.856404913 | 0.840453381 | 0.015951532  | 0.000182144 | 0.161419482 | chr3  | 14545312  |
| cg16533336 | 0.769445535 | 0.723094279 | 0.046351256  | 0.000182214 | 0.161419482 | chr7  | 70765583  |

|                |             |             |              |             |             |       |           |
|----------------|-------------|-------------|--------------|-------------|-------------|-------|-----------|
| cg20010054     | 0.685581447 | 0.703206844 | -0.017625398 | 0.000186646 | 0.165025405 | chr14 | 102714291 |
| cg20211088     | 0.16862742  | 0.196966863 | -0.028339442 | 0.000187061 | 0.165050633 | chr6  | 13712555  |
| cg04282497     | 0.691998302 | 0.708192867 | -0.016194565 | 0.00018759  | 0.165050633 | chr4  | 82350883  |
| cg04628413     | 0.059131847 | 0.069015413 | -0.009883566 | 0.00018776  | 0.165050633 | chr16 | 28962222  |
| cg12794168     | 0.852130882 | 0.862229016 | -0.010098134 | 0.000189341 | 0.166120979 | chr15 | 37110614  |
| cg05825459     | 0.586572123 | 0.613904782 | -0.027332659 | 0.000189961 | 0.166344334 | chr2  | 205543455 |
| cg03875082     | 0.816373274 | 0.833772487 | -0.017399213 | 0.000190659 | 0.16663644  | chr16 | 18483197  |
| cg01122304     | 0.088995459 | 0.105783816 | -0.016788357 | 0.000191666 | 0.167195677 | chr4  | 2845576   |
| cg19468946     | 0.888606748 | 0.868741342 | 0.019865406  | 0.000194217 | 0.169097689 | chr17 | 37922297  |
| cg05544828     | 0.926284212 | 0.917370713 | 0.008913499  | 0.000194793 | 0.169275951 | chr6  | 35395209  |
| cg10923702     | 0.900925355 | 0.907701278 | -0.006775923 | 0.000195826 | 0.169850488 | chr13 | 44542862  |
| cg26940109     | 0.789661542 | 0.810630292 | -0.02096875  | 0.000196207 | 0.169857686 | chr1  | 32095849  |
| cg14063468     | 0.875755744 | 0.852990276 | 0.022765467  | 0.00019756  | 0.170530056 | chr9  | 123339570 |
| cg25739700     | 0.72118634  | 0.697718089 | 0.02346825   | 0.000197731 | 0.170530056 | chr17 | 5393371   |
| cg02501155     | 0.937343805 | 0.927500909 | 0.009842896  | 0.000198148 | 0.170567417 | chr16 | 79263473  |
| cg01223171     | 0.882562179 | 0.866766038 | 0.01579614   | 0.000198935 | 0.170922472 | chr4  | 61660358  |
| cg09399236     | 0.12629288  | 0.139854903 | -0.013562024 | 0.000200292 | 0.171002276 | chr3  | 101293650 |
| cg13943052     | 0.16113556  | 0.176851411 | -0.015715852 | 0.000200426 | 0.171002276 | chr15 | 40987167  |
| cg03537567     | 0.658619438 | 0.642522982 | 0.016096456  | 0.000201135 | 0.171002276 | chr4  | 25375829  |
| cg24421865     | 0.833222808 | 0.811093734 | 0.022129074  | 0.000201298 | 0.171002276 | chr21 | 45919623  |
| cg07891737     | 0.68080739  | 0.699823145 | -0.019015755 | 0.000201586 | 0.171002276 | chr19 | 54215577  |
| cg10726312     | 0.773020957 | 0.739962032 | 0.033058926  | 0.000201906 | 0.171002276 | chr2  | 85837083  |
| cg11402396     | 0.566351443 | 0.589087206 | -0.022735763 | 0.000201932 | 0.171002276 | chr10 | 13364856  |
| cg19505364     | 0.780369988 | 0.795530564 | -0.015160576 | 0.000202292 | 0.171002276 | chr4  | 583022    |
| cg07221511     | 0.945337992 | 0.937264145 | 0.008073847  | 0.000202401 | 0.171002276 | chr3  | 164009569 |
| cg15118745     | 0.675829451 | 0.696538272 | -0.020708821 | 0.000205031 | 0.172903732 | chr17 | 33580897  |
| cg10476980     | 0.762228487 | 0.733070807 | 0.02915768   | 0.000207027 | 0.174264882 | chrX  | 134051922 |
| cg19733894     | 0.812361731 | 0.822614076 | -0.010252345 | 0.000207605 | 0.174375036 | chr2  | 33111822  |
| cg13724788     | 0.253650125 | 0.220755886 | 0.03289424   | 0.000207922 | 0.174375036 | chr19 | 19322778  |
| cg14131834     | 0.566486998 | 0.590263215 | -0.023776217 | 0.000208587 | 0.174611652 | chr13 | 45914250  |
| cg04524239     | 0.851632627 | 0.869482047 | -0.01784942  | 0.000209963 | 0.175441732 | chr15 | 25320886  |
| cg11280668     | 0.680925581 | 0.657714847 | 0.023210735  | 0.00021128  | 0.175983458 | chrX  | 17754811  |
| cg11733626     | 0.144011978 | 0.15809598  | -0.014084002 | 0.000211742 | 0.175983458 | chr3  | 123304043 |
| cg00643086     | 0.126237234 | 0.141466143 | -0.015228909 | 0.000211769 | 0.175983458 | chr6  | 26332252  |
| cg19157724     | 0.864356396 | 0.852485366 | 0.01187103   | 0.000214072 | 0.176667885 | chr2  | 98337094  |
| ch.2.42814419F | 0.224132804 | 0.238497668 | -0.014364865 | 0.000214088 | 0.176667885 | chr2  | 42960915  |
| cg25204764     | 0.846995625 | 0.826017743 | 0.020977882  | 0.000214358 | 0.176667885 | chr1  | 24995933  |
| cg15088324     | 0.743137911 | 0.76367292  | -0.020535009 | 0.000214747 | 0.176667885 | chr19 | 6707621   |
| cg13460740     | 0.827585245 | 0.841694393 | -0.014109148 | 0.000215258 | 0.176667885 | chr22 | 21369777  |
| cg06112727     | 0.034941805 | 0.026725454 | 0.00821635   | 0.000215262 | 0.176667885 | chr8  | 22102711  |
| cg18834652     | 0.615811908 | 0.60083154  | 0.014980369  | 0.000215874 | 0.176667885 | chr11 | 94276072  |
| cg02039485     | 0.844219095 | 0.830784779 | 0.013434316  | 0.000216439 | 0.176667885 | chr14 | 93570854  |
| cg15061682     | 0.835359413 | 0.850471803 | -0.01511239  | 0.000216644 | 0.176667885 | chr13 | 102850387 |
| cg06138195     | 0.615382819 | 0.638400389 | -0.02301757  | 0.000216767 | 0.176667885 | chr17 | 45143871  |
| cg15751667     | 0.617908126 | 0.58367883  | 0.034229296  | 0.000216852 | 0.176667885 | chr19 | 33574995  |
| cg15936935     | 0.388783011 | 0.408473022 | -0.019690011 | 0.000218294 | 0.177525332 | chr14 | 105827276 |
| cg11224984     | 0.911792337 | 0.90505005  | 0.006742287  | 0.000219336 | 0.177782078 | chr1  | 2203045   |



|            |             |             |              |             |             |       |           |
|------------|-------------|-------------|--------------|-------------|-------------|-------|-----------|
| cg24425342 | 0.952058655 | 0.946201457 | 0.005857197  | 0.000219447 | 0.177782078 | chr19 | 3114929   |
| cg20149362 | 0.642896233 | 0.607455784 | 0.035440449  | 0.000219886 | 0.177782078 | chr1  | 7834809   |
| cg13367929 | 0.965321277 | 0.959293615 | 0.006027661  | 0.000220269 | 0.177782078 | chr5  | 176077110 |
| cg14780883 | 0.66136414  | 0.676720914 | -0.015356774 | 0.000220573 | 0.177782078 | chr15 | 25466402  |
| cg23912186 | 0.884833058 | 0.899900125 | -0.015067066 | 0.000221176 | 0.177782078 | chr1  | 207144812 |
| cg05728519 | 0.083612166 | 0.102650016 | -0.01903785  | 0.000221337 | 0.177782078 | chr12 | 48551378  |
| cg01764341 | 0.872205715 | 0.857040091 | 0.015165624  | 0.000222347 | 0.178107297 | chr1  | 145095823 |
| cg19901994 | 0.945234809 | 0.936414306 | 0.008820503  | 0.000222523 | 0.178107297 | chr8  | 27288146  |
| cg10698327 | 0.11917989  | 0.090722275 | 0.028457615  | 0.00022375  | 0.178316595 | chr4  | 9534651   |
| cg11522201 | 0.096244348 | 0.106835274 | -0.010590926 | 0.000223886 | 0.178316595 | chr9  | 95432733  |
| cg20326359 | 0.819984024 | 0.83273962  | -0.012755596 | 0.000223957 | 0.178316595 | chr14 | 101450218 |
| cg09773897 | 0.881549007 | 0.863499888 | 0.018049118  | 0.000224938 | 0.178785823 | chr19 | 3364892   |
| cg23028721 | 0.626685431 | 0.654385367 | -0.027699937 | 0.000225661 | 0.178845534 | chr1  | 248365229 |
| cg03010018 | 0.902666647 | 0.892939996 | 0.009726652  | 0.000225797 | 0.178845534 | chr11 | 116708299 |
| cg14968543 | 0.264175447 | 0.294853752 | -0.030678305 | 0.000226853 | 0.179081846 | chr8  | 99986964  |
| cg12785139 | 0.723634031 | 0.754592517 | -0.030958486 | 0.00022688  | 0.179081846 | chr2  | 130766434 |
| cg08770523 | 0.085143751 | 0.101981701 | -0.016837951 | 0.000227394 | 0.179177244 | chr4  | 103266227 |
| cg06080712 | 0.542845794 | 0.564492059 | -0.021646264 | 0.000228409 | 0.179578219 | chr22 | 32435515  |
| cg13567025 | 0.088487598 | 0.095612001 | -0.007124403 | 0.00022869  | 0.179578219 | chr1  | 236958589 |
| cg16058880 | 0.099366981 | 0.105885887 | -0.006518906 | 0.000231169 | 0.180771684 | chr1  | 145039638 |
| cg01813209 | 0.448190837 | 0.468848913 | -0.020658075 | 0.000231644 | 0.180771684 | chr2  | 71615655  |
| cg08066535 | 0.681874325 | 0.697967375 | -0.01609305  | 0.000231685 | 0.180771684 | chr6  | 11649444  |
| cg21017641 | 0.918126631 | 0.928136194 | -0.010009563 | 0.000231795 | 0.180771684 | chr13 | 114786850 |
| cg21229103 | 0.845602966 | 0.820696077 | 0.024906889  | 0.000232464 | 0.180888956 | chr9  | 140738145 |
| cg19678730 | 0.83351886  | 0.84769806  | -0.0141792   | 0.000232738 | 0.180888956 | chr12 | 9280567   |
| cg18058682 | 0.800738106 | 0.818086771 | -0.017348665 | 0.000233514 | 0.181121648 | chr15 | 25466114  |
| cg25227755 | 0.832164749 | 0.855559663 | -0.023394914 | 0.000234316 | 0.181121648 | chr20 | 37374470  |
| cg00565075 | 0.252183646 | 0.297432944 | -0.045249298 | 0.000234368 | 0.181121648 | chr22 | 38244893  |
| cg27574244 | 0.173418827 | 0.189285476 | -0.015866649 | 0.000234626 | 0.181121648 | chr17 | 80709357  |
| cg09502339 | 0.884595671 | 0.870454106 | 0.014141565  | 0.00023575  | 0.181682507 | chr6  | 33152642  |
| cg00936904 | 0.713130511 | 0.776337744 | -0.063207233 | 0.000236177 | 0.181704134 | chr4  | 190731885 |
| cg01127291 | 0.732873396 | 0.700690261 | 0.032183136  | 0.000237115 | 0.181824628 | chrX  | 63424405  |
| cg01745539 | 0.729652936 | 0.657496722 | 0.072156214  | 0.00023713  | 0.181824628 | chr6  | 32632331  |
| cg27527798 | 0.741694224 | 0.709251441 | 0.032442783  | 0.000238714 | 0.182494294 | chr7  | 1773245   |
| cg22991512 | 0.20464014  | 0.185019356 | 0.019620784  | 0.000238804 | 0.182494294 | chr3  | 14643854  |
| cg08836619 | 0.227917412 | 0.250354651 | -0.022437239 | 0.000239651 | 0.182561514 | chr5  | 139555389 |
| cg01541565 | 0.615477529 | 0.570604893 | 0.044872637  | 0.000239692 | 0.182561514 | chr6  | 32606385  |
| cg10532407 | 0.863875311 | 0.879512906 | -0.015637595 | 0.000240263 | 0.182691034 | chr3  | 21448012  |
| cg18761118 | 0.742518736 | 0.72660581  | 0.015912926  | 0.000241903 | 0.183344674 | chr1  | 53388030  |
| cg01858764 | 0.851303843 | 0.83601267  | 0.015291172  | 0.000241926 | 0.183344674 | chr11 | 118862530 |
| cg10568796 | 0.724891972 | 0.69804283  | 0.026849142  | 0.000243911 | 0.184413704 | chr22 | 21193857  |
| cg06060754 | 0.646747501 | 0.479560634 | 0.167186867  | 0.000244145 | 0.184413704 | chr5  | 176797920 |
| cg14066075 | 0.916272245 | 0.905108088 | 0.011164157  | 0.000245771 | 0.184636551 | chr9  | 140325583 |
| cg26624273 | 0.097037459 | 0.106314252 | -0.009276793 | 0.00024628  | 0.184636551 | chr1  | 38019894  |
| cg21848624 | 0.854812672 | 0.764123788 | 0.090688883  | 0.000246315 | 0.184636551 | chr18 | 77219388  |
| cg08273502 | 0.764043558 | 0.776669355 | -0.012625797 | 0.000246592 | 0.184636551 | chr14 | 84979439  |
| cg01896432 | 0.738965387 | 0.765305381 | -0.026339994 | 0.000246724 | 0.184636551 | chr4  | 68904160  |

|            |             |             |              |             |             |       |           |
|------------|-------------|-------------|--------------|-------------|-------------|-------|-----------|
| cg03298314 | 0.72845052  | 0.691624636 | 0.036825884  | 0.000246868 | 0.184636551 | chr6  | 30311668  |
| cg27513204 | 0.797844131 | 0.810204975 | -0.012360843 | 0.000247998 | 0.184661377 | chr1  | 222673618 |
| cg24793265 | 0.888910795 | 0.876272327 | 0.012638468  | 0.000248114 | 0.184661377 | chr9  | 139269240 |
| cg01315787 | 0.891978904 | 0.872949556 | 0.019029348  | 0.000248116 | 0.184661377 | chr5  | 173450571 |
| cg09563846 | 0.962720758 | 0.96746885  | -0.004748092 | 0.000248929 | 0.18496473  | chr11 | 875758    |
| cg06947694 | 0.916848593 | 0.90747454  | 0.009374053  | 0.000250148 | 0.185305568 | chr7  | 5389271   |
| cg21158502 | 0.404877695 | 0.361716035 | 0.043161661  | 0.000250212 | 0.185305568 | chr5  | 74348187  |
| cg27558479 | 0.098405277 | 0.107642977 | -0.0092377   | 0.00025067  | 0.185305568 | chr2  | 74425610  |
| cg25642880 | 0.819550057 | 0.831666605 | -0.012116548 | 0.000251012 | 0.185305568 | chr13 | 96581176  |
| cg01412011 | 0.770493128 | 0.748163427 | 0.022329701  | 0.000251758 | 0.185555723 | chr4  | 3652433   |
| cg23981611 | 0.822191773 | 0.791908828 | 0.030282945  | 0.000252794 | 0.18585813  | chr6  | 30167399  |
| cg22455795 | 0.427841406 | 0.457989767 | -0.030148361 | 0.000253286 | 0.18585813  | chr19 | 41109651  |
| cg27399012 | 0.069418573 | 0.057446519 | 0.011972054  | 0.00025339  | 0.18585813  | chr17 | 16342849  |
| cg13284614 | 0.925890848 | 0.920122083 | 0.005768765  | 0.000253856 | 0.185900722 | chr3  | 52569169  |
| cg03983398 | 0.864657577 | 0.854331059 | 0.010326518  | 0.000254276 | 0.185909901 | chr1  | 45254530  |
| cg25754733 | 0.931960824 | 0.926450214 | 0.00551061   | 0.00025618  | 0.187002593 | chr19 | 640965    |
| cg02052377 | 0.65048077  | 0.623219069 | 0.027261701  | 0.000257894 | 0.187952679 | chr11 | 10674182  |
| cg23009962 | 0.915711339 | 0.911397401 | 0.004313938  | 0.000258434 | 0.188046274 | chr19 | 18572435  |
| cg13003239 | 0.516506829 | 0.535248899 | -0.018742071 | 0.000259252 | 0.188340769 | chr3  | 49044627  |
| cg02542817 | 0.907885162 | 0.92446654  | -0.016581378 | 0.000260584 | 0.189007939 | chr2  | 229291442 |
| cg23762263 | 0.433944395 | 0.393793711 | 0.040150684  | 0.000261655 | 0.189350708 | chr2  | 154730326 |
| cg15412228 | 0.963238671 | 0.956281535 | 0.006957136  | 0.000261887 | 0.189350708 | chr14 | 104718313 |
| cg08782677 | 0.786566286 | 0.762482254 | 0.024084032  | 0.000262555 | 0.189533552 | chrX  | 150346292 |
| cg09242008 | 0.929163408 | 0.91980694  | 0.009356468  | 0.000263544 | 0.189897182 | chr3  | 108839099 |
| cg26657101 | 0.820041075 | 0.833593126 | -0.013552051 | 0.000264163 | 0.189897182 | chr15 | 97322869  |
| cg07280582 | 0.788121942 | 0.81203362  | -0.023911679 | 0.000264542 | 0.189897182 | chr12 | 53854172  |
| cg16336120 | 0.312677213 | 0.287262466 | 0.025414747  | 0.000264724 | 0.189897182 | chr7  | 45197318  |
| cg25059445 | 0.732824184 | 0.750534643 | -0.017710459 | 0.000265304 | 0.190014768 | chr4  | 178366587 |
| cg03860054 | 0.46545222  | 0.485468853 | -0.020016633 | 0.000266329 | 0.190449271 | chr16 | 55691102  |
| cg02327123 | 0.13471752  | 0.123466451 | 0.011251068  | 0.000267662 | 0.190548842 | chr7  | 101006363 |
| cg11716064 | 0.45511685  | 0.479564047 | -0.024447197 | 0.000267872 | 0.190548842 | chr10 | 129477313 |
| cg17509989 | 0.591391829 | 0.393038177 | 0.198353652  | 0.000268109 | 0.190548842 | chr5  | 176798049 |
| cg22550003 | 0.938700665 | 0.930362538 | 0.008338127  | 0.000268873 | 0.190548842 | chr15 | 44170550  |
| cg06684407 | 0.863435187 | 0.842468971 | 0.020966215  | 0.00026896  | 0.190548842 | chr21 | 46356806  |
| cg08888487 | 0.886793585 | 0.895968679 | -0.009175094 | 0.000269312 | 0.190548842 | chr5  | 1124759   |
| cg05744487 | 0.541050741 | 0.513661332 | 0.027389409  | 0.000269804 | 0.190548842 | chr11 | 18720220  |
| cg19081571 | 0.924705285 | 0.916753794 | 0.007951492  | 0.000269809 | 0.190548842 | chr1  | 1190137   |
| cg01794265 | 0.083898176 | 0.092751278 | -0.008853102 | 0.000272201 | 0.191755714 | chr5  | 14582549  |
| cg18391747 | 0.619161065 | 0.646424972 | -0.027263907 | 0.000272584 | 0.191755714 | chr1  | 161375390 |
| cg06151505 | 0.715577558 | 0.731757869 | -0.01618031  | 0.000273156 | 0.191755714 | chr3  | 138866874 |
| cg24865495 | 0.917582358 | 0.907307351 | 0.010275008  | 0.000273963 | 0.191755714 | chr11 | 63912769  |
| cg22016770 | 0.668688906 | 0.690252591 | -0.021563685 | 0.000274219 | 0.191755714 | chr5  | 42468779  |
| cg11675409 | 0.747634541 | 0.730290224 | 0.017344317  | 0.000274243 | 0.191755714 | chr15 | 44083712  |
| cg24152845 | 0.608324883 | 0.628187058 | -0.019862175 | 0.000274865 | 0.191755714 | chr15 | 25414763  |
| cg06253862 | 0.706505764 | 0.735740359 | -0.029234595 | 0.00027488  | 0.191755714 | chr6  | 160201362 |
| cg03464692 | 0.815493678 | 0.835272362 | -0.019778684 | 0.000277433 | 0.193240621 | chr4  | 1631517   |
| cg00649216 | 0.801719158 | 0.820013231 | -0.018294073 | 0.000277884 | 0.193259958 | chr6  | 63921501  |

|            |             |             |              |             |             |       |           |
|------------|-------------|-------------|--------------|-------------|-------------|-------|-----------|
| cg08048222 | 0.185963749 | 0.207834817 | -0.021871068 | 0.000278373 | 0.193305278 | chr19 | 58239012  |
| cg15393022 | 0.892906673 | 0.882760543 | 0.01014613   | 0.000280241 | 0.194306872 | chr1  | 54775837  |
| cg19892525 | 0.469084954 | 0.493428895 | -0.02434394  | 0.000281138 | 0.194484369 | chr11 | 108157498 |
| cg13882665 | 0.742648091 | 0.757076928 | -0.014428837 | 0.000281698 | 0.194484369 | chr6  | 169560079 |
| cg15825373 | 0.750666845 | 0.725543259 | 0.025123586  | 0.000281815 | 0.194484369 | chr1  | 947153    |
| cg01575164 | 0.714362906 | 0.729474296 | -0.01511139  | 0.000282202 | 0.194484369 | chr3  | 197515016 |
| cg12679725 | 0.942994866 | 0.954417633 | -0.011422767 | 0.000284382 | 0.195606122 | chr22 | 42551834  |
| cg09412808 | 0.860331424 | 0.852670522 | 0.007660903  | 0.000284987 | 0.195606122 | chr4  | 57180590  |
| cg06251958 | 0.598259794 | 0.615495354 | -0.01723556  | 0.000285116 | 0.195606122 | chr7  | 102989081 |
| cg27466615 | 0.924594677 | 0.91339647  | 0.011198207  | 0.00028699  | 0.195965977 | chr17 | 80678315  |
| cg24621371 | 0.765118695 | 0.744348292 | 0.020770404  | 0.000287086 | 0.195965977 | chr12 | 125531715 |
| cg00559790 | 0.088428407 | 0.099099962 | -0.010671555 | 0.000287119 | 0.195965977 | chr1  | 93914052  |
| cg02592416 | 0.867907418 | 0.878602019 | -0.0106946   | 0.000287922 | 0.195965977 | chr12 | 52680161  |
| cg08866814 | 0.94489444  | 0.936581538 | 0.008312902  | 0.000288111 | 0.195965977 | chr16 | 89351500  |
| cg05735180 | 0.607043895 | 0.564470802 | 0.042573093  | 0.000288218 | 0.195965977 | chr18 | 55095177  |
| cg09622269 | 0.588894194 | 0.622904268 | -0.034010075 | 0.00028948  | 0.196285281 | chr10 | 76803925  |
| cg15019005 | 0.722928867 | 0.737784067 | -0.0148552   | 0.00028978  | 0.196285281 | chr5  | 7825313   |
| cg13898697 | 0.913325257 | 0.908460482 | 0.004864775  | 0.000289978 | 0.196285281 | chr1  | 36641773  |
| cg08742360 | 0.817221173 | 0.804605253 | 0.01261592   | 0.000291031 | 0.196706091 | chr6  | 149019254 |
| cg13534503 | 0.958462717 | 0.964821733 | -0.006359016 | 0.0002917   | 0.196866535 | chr9  | 139535765 |
| cg26473110 | 0.76182225  | 0.742990695 | 0.018831555  | 0.000293379 | 0.197607128 | chr11 | 46385365  |
| cg14145438 | 0.927958625 | 0.916704929 | 0.011253696  | 0.000293699 | 0.197607128 | chr3  | 43428668  |
| cg10169812 | 0.907399315 | 0.891423454 | 0.015975861  | 0.000294097 | 0.197607128 | chr4  | 15779392  |
| cg17897352 | 0.876081556 | 0.885908908 | -0.009827352 | 0.00029529  | 0.197752564 | chr10 | 121011644 |
| cg23530263 | 0.234654116 | 0.264149869 | -0.029495753 | 0.000295452 | 0.197752564 | chr19 | 55996431  |
| cg10741826 | 0.919710192 | 0.915910812 | 0.00379938   | 0.00029685  | 0.197752564 | chr11 | 128680466 |
| cg13152990 | 0.856647504 | 0.877000852 | -0.020353349 | 0.000297024 | 0.197752564 | chr13 | 39584965  |
| cg11075121 | 0.107117969 | 0.12023474  | -0.013116771 | 0.000297085 | 0.197752564 | chr12 | 120967065 |
| cg07141527 | 0.741062131 | 0.717492485 | 0.023569645  | 0.000297332 | 0.197752564 | chr12 | 121202554 |
| cg17079378 | 0.023224868 | 0.03044584  | -0.007220972 | 0.000297458 | 0.197752564 | chr1  | 46713440  |
| cg06186457 | 0.398790194 | 0.417121632 | -0.018331438 | 0.000298186 | 0.197752564 | chr6  | 4504273   |
| cg11601443 | 0.857664303 | 0.839656341 | 0.018007962  | 0.000298214 | 0.197752564 | chr12 | 113415930 |
| cg14700153 | 0.937392538 | 0.930579922 | 0.006812615  | 0.000300067 | 0.198271306 | chr18 | 77515904  |
| cg23197881 | 0.113501352 | 0.128224005 | -0.014722653 | 0.000300249 | 0.198271306 | chr12 | 70133421  |
| cg26353844 | 0.495879766 | 0.521342055 | -0.02546229  | 0.00030064  | 0.198271306 | chr1  | 95133907  |
| cg23530053 | 0.122324786 | 0.136151756 | -0.01382697  | 0.000301504 | 0.198271306 | chr18 | 20513673  |
| cg22529861 | 0.111732076 | 0.120395667 | -0.008663591 | 0.000301543 | 0.198271306 | chr11 | 11643697  |
| cg04830812 | 0.579047891 | 0.548687897 | 0.030359995  | 0.000301604 | 0.198271306 | chr12 | 7074724   |
| cg05086567 | 0.901240296 | 0.907659327 | -0.006419032 | 0.000303085 | 0.198958127 | chr17 | 7486615   |
| cg08731817 | 0.864353941 | 0.845380334 | 0.018973607  | 0.000305014 | 0.199349794 | chr6  | 158443177 |
| cg23465426 | 0.445005759 | 0.461877079 | -0.016871321 | 0.000305338 | 0.199349794 | chr6  | 32847377  |
| cg04111029 | 0.779955779 | 0.753588012 | 0.026367767  | 0.000305614 | 0.199349794 | chr2  | 17718449  |
| cg07578410 | 0.157799191 | 0.178531155 | -0.020731964 | 0.000305866 | 0.199349794 | chr5  | 171710114 |

**Supplementary Table S2: CpGs associated with E2 levels in PCOS patients**

| Row.names  | intercept   | beta         | t            | pval     | qval        | chr   | pos       |
|------------|-------------|--------------|--------------|----------|-------------|-------|-----------|
| cg23363602 | 0.102166234 | 0.000817118  | 8.513428889  | 2.96E-09 | 0.000824783 | chr6  | 29933971  |
| cg11136592 | 0.984405633 | -0.001792114 | -8.454523353 | 3.41E-09 | 0.000824783 | chr10 | 5246625   |
| cg13551074 | 0.925127162 | -0.001251204 | -7.548275307 | 3.19E-08 | 0.003682075 | chr2  | 243017952 |
| cg00836091 | 0.120749179 | -0.000270603 | -7.433627511 | 4.27E-08 | 0.003682075 | chr3  | 53290192  |
| cg02031121 | 1.042458795 | -0.001966545 | -7.407831518 | 4.56E-08 | 0.003682075 | chr15 | 52331471  |
| cg15027633 | 1.009287773 | -0.001623296 | -7.407381353 | 4.57E-08 | 0.003682075 | chr6  | 14771388  |
| cg08872590 | 0.010982342 | 0.000707927  | 7.25610341   | 6.72E-08 | 0.004027238 | chr8  | 145748059 |
| cg26537272 | 0.987450513 | -0.001543158 | -7.238354418 | 7.03E-08 | 0.004027238 | chr5  | 1214606   |
| cg11005027 | 1.006946104 | -0.002397732 | -7.207541655 | 7.61E-08 | 0.004027238 | chr11 | 134237890 |
| cg24983605 | 0.946537249 | -0.001372675 | -7.138973695 | 9.08E-08 | 0.004027238 | chr2  | 180487919 |
| cg16114706 | 0.91656486  | -0.001117874 | -7.135666408 | 9.16E-08 | 0.004027238 | chr22 | 46509464  |
| cg01726982 | 0.965072066 | -0.001348006 | -6.877137527 | 1.79E-07 | 0.007214339 | chr1  | 228630108 |
| cg18266400 | 1.039032765 | -0.002090381 | -6.802361278 | 2.18E-07 | 0.007547297 | chr3  | 124990403 |
| cg05146395 | 0.975735319 | -0.001888482 | -6.722094178 | 2.68E-07 | 0.007547297 | chr20 | 61314143  |
| cg03884018 | 1.055553325 | -0.002715018 | -6.708728487 | 2.78E-07 | 0.007547297 | chr16 | 26044240  |
| cg18988159 | 0.998456927 | -0.001776554 | -6.695506883 | 2.88E-07 | 0.007547297 | chr8  | 33459821  |
| cg12578563 | 1.039350345 | -0.001836262 | -6.681426845 | 2.99E-07 | 0.007547297 | chr11 | 1159210   |
| cg08466517 | 1.095352704 | -0.003463201 | -6.670940596 | 3.07E-07 | 0.007547297 | chr4  | 122138632 |
| cg15423862 | 0.977504675 | -0.00093381  | -6.66973127  | 3.08E-07 | 0.007547297 | chr3  | 155838109 |
| cg07560948 | 0.885211851 | -0.001145255 | -6.662018199 | 3.14E-07 | 0.007547297 | chr1  | 41264498  |
| cg26008260 | 1.005072573 | -0.001433416 | -6.638965971 | 3.34E-07 | 0.007547297 | chr2  | 25057298  |
| cg23934075 | 0.058674222 | 0.000644621  | 6.628537809  | 3.43E-07 | 0.007547297 | chr6  | 29933697  |
| cg06686422 | 0.995510621 | -0.002174586 | -6.604626698 | 3.66E-07 | 0.007688472 | chr5  | 174174566 |
| cg07719523 | 0.986737203 | -0.001711395 | -6.577992408 | 3.92E-07 | 0.007904158 | chr19 | 746526    |
| cg07370274 | 0.9713068   | -0.001350294 | -6.560045298 | 4.11E-07 | 0.007956019 | chr9  | 29825210  |
| cg18098534 | 0.97871495  | -0.001429284 | -6.538160023 | 4.36E-07 | 0.007967486 | chr14 | 86088124  |
| cg19453472 | 0.982383986 | -0.002095055 | -6.530363221 | 4.45E-07 | 0.007967486 | chr7  | 1139076   |
| cg04842352 | 0.101764429 | 0.00218088   | 6.513497387  | 4.65E-07 | 0.008033253 | chr16 | 49907368  |
| cg20006652 | 0.792518388 | -0.001261566 | -6.49618871  | 4.87E-07 | 0.008094732 | chr6  | 142238173 |
| cg07592775 | 1.010080904 | -0.002513548 | -6.484541406 | 5.02E-07 | 0.008094732 | chr1  | 19210017  |
| cg09730955 | 0.982416577 | -0.001491325 | -6.444471677 | 5.58E-07 | 0.008710969 | chr5  | 143130392 |
| cg04644773 | 0.098265839 | 0.000591849  | 6.424436701  | 5.89E-07 | 0.008899302 | chr5  | 179636283 |
| cg16919579 | 0.806435661 | -0.00106288  | -6.402249685 | 6.24E-07 | 0.009153098 | chr2  | 157632795 |
| cg18523346 | 0.950634468 | -0.001349508 | -6.382363322 | 6.58E-07 | 0.009365792 | chr4  | 1729959   |
| cg19536902 | 1.049122177 | -0.002368287 | -6.302565732 | 8.14E-07 | 0.011058543 | chr11 | 13305152  |
| cg09259797 | 0.993810453 | -0.001350703 | -6.298453801 | 8.23E-07 | 0.011058543 | chr13 | 106650225 |
| cg02038418 | 1.022326208 | -0.001367376 | -6.281969319 | 8.60E-07 | 0.011243031 | chr15 | 39958882  |
| cg11932575 | 0.956522474 | -0.001274017 | -6.26888896  | 8.90E-07 | 0.011291198 | chr4  | 128048177 |
| cg25165144 | 0.938144242 | -0.001937173 | -6.260631399 | 9.10E-07 | 0.011291198 | chr12 | 670974    |
| cg09730302 | 0.939598714 | -0.002150691 | -6.23620939  | 9.72E-07 | 0.011750563 | chr10 | 128595047 |
| cg07784793 | 1.009773231 | -0.001626202 | -6.223817666 | 1.00E-06 | 0.011849775 | chr5  | 33794720  |
| cg16437009 | 0.051013097 | 0.002883909  | 6.208226652  | 1.05E-06 | 0.012059789 | chr10 | 98945799  |
| cg23598886 | 0.902376237 | -0.000717029 | -6.192401042 | 1.09E-06 | 0.012077031 | chr18 | 12777645  |
| cg08026818 | 0.080613733 | 0.000238686  | 6.181893102  | 1.12E-06 | 0.012077031 | chr16 | 77823221  |
| cg09532664 | 0.993697121 | -0.002073933 | -6.183425746 | 1.12E-06 | 0.012077031 | chr5  | 9631216   |



|               |             |              |              |          |             |       |           |
|---------------|-------------|--------------|--------------|----------|-------------|-------|-----------|
| cg26197930    | 1.000250414 | -0.002710581 | -6.1661697   | 1.17E-06 | 0.012322202 | chr5  | 1222775   |
| cg00807237    | 0.930401632 | -0.001287438 | -6.156806948 | 1.20E-06 | 0.012366131 | chr7  | 934156    |
| cg11176525    | 0.968836611 | -0.001038188 | -6.113353515 | 1.35E-06 | 0.013603585 | chr3  | 45003829  |
| cg05483487    | 0.90063237  | -0.002092788 | -6.088966746 | 1.44E-06 | 0.013736558 | chr12 | 670892    |
| cg08836825    | 0.91831665  | -0.001138895 | -6.087847778 | 1.45E-06 | 0.013736558 | chr6  | 82726757  |
| cg07836887    | 0.970957939 | -0.000959096 | -6.077207083 | 1.49E-06 | 0.013736558 | chr17 | 5346448   |
| cg00048705    | 0.975200399 | -0.001194602 | -6.066490357 | 1.53E-06 | 0.013736558 | chr6  | 170563326 |
| cg05798111    | 0.960355763 | -0.001707681 | -6.063900289 | 1.54E-06 | 0.013736558 | chr16 | 68560845  |
| cg04024413    | 0.045709707 | 0.000497755  | 6.05960211   | 1.56E-06 | 0.013736558 | chr6  | 27782541  |
| cg21630370    | 0.88423895  | -0.001249349 | -6.05899613  | 1.56E-06 | 0.013736558 | chr7  | 45141979  |
| cg03570577    | 0.880979856 | -0.000940478 | -6.04137466  | 1.64E-06 | 0.014042959 | chr6  | 29765324  |
| cg08320316    | 0.977598548 | -0.001095686 | -6.037488313 | 1.65E-06 | 0.014042959 | chr7  | 5812747   |
| cg03085859    | 0.605584326 | -0.000378136 | -5.965093201 | 2.01E-06 | 0.016768067 | chr6  | 29457094  |
| cg27509366    | 0.966084078 | -0.001497949 | -5.949699299 | 2.10E-06 | 0.017155048 | chr8  | 142149222 |
| cg26977256    | 0.906259875 | -0.000514391 | -5.944036768 | 2.13E-06 | 0.017155048 | chr6  | 32022470  |
| cg05780294    | 0.943688775 | -0.001348351 | -5.929062056 | 2.22E-06 | 0.017568703 | chr7  | 128312789 |
| cg06880420    | 0.917687164 | -0.001437508 | -5.913685325 | 2.31E-06 | 0.018016985 | chr1  | 200119987 |
| cg16771467    | 0.939395563 | 0.000132464  | 5.871948166  | 2.58E-06 | 0.019602154 | chr18 | 55315872  |
| cg02747151    | 1.015507363 | -0.001304901 | -5.870574733 | 2.59E-06 | 0.019602154 | chr15 | 25981177  |
| cg22829451    | 0.948169278 | -0.000946094 | -5.864923058 | 2.63E-06 | 0.019602154 | chrX  | 70151816  |
| cg17822978    | 0.979140673 | -0.001112134 | -5.850586092 | 2.74E-06 | 0.020067263 | chr15 | 72073485  |
| cg13085030    | 1.006686713 | -0.002093239 | -5.829056711 | 2.90E-06 | 0.020951678 | chr7  | 1090504   |
| cg24709001    | 0.979009132 | -0.001017204 | -5.82357548  | 2.95E-06 | 0.020951678 | chr4  | 3235319   |
| cg10541332    | 0.087687504 | 0.000767506  | 5.816372806  | 3.00E-06 | 0.021053982 | chr3  | 61237712  |
| cg07830126    | 0.923727736 | -0.001560464 | -5.804234672 | 3.10E-06 | 0.02128189  | chr1  | 3477690   |
| cg07341073    | 0.920425244 | 0.000283371  | 5.801823128  | 3.12E-06 | 0.02128189  | chr2  | 175300689 |
| cg07170252    | 0.985493171 | -0.001778107 | -5.772753421 | 3.38E-06 | 0.022525126 | chr14 | 76870544  |
| cg26996890    | 0.974780924 | -0.001335019 | -5.770568583 | 3.40E-06 | 0.022525126 | chr7  | 1980808   |
| cg19205926    | 0.88259869  | -0.000730957 | -5.757432212 | 3.52E-06 | 0.023025056 | chr4  | 6757569   |
| cg01758856    | 0.93419929  | -0.000348531 | -5.708830688 | 4.02E-06 | 0.025914615 | chr17 | 80814611  |
| cg19987253    | 0.884869383 | -0.000440388 | -5.700130628 | 4.11E-06 | 0.025971281 | chr7  | 1981314   |
| cg11004284    | 0.179800467 | 0.001736618  | 5.698315461  | 4.13E-06 | 0.025971281 | chr3  | 15470105  |
| cg01267068    | 0.937999507 | -0.001341237 | -5.633158125 | 4.93E-06 | 0.030595128 | chr2  | 731158    |
| cg04218124    | 0.86796176  | -0.001119482 | -5.600567351 | 5.39E-06 | 0.033003053 | chr2  | 219284345 |
| cg20675194    | 0.949390537 | -0.000790818 | -5.580788159 | 5.69E-06 | 0.034389735 | chr11 | 58694219  |
| cg01380321    | 0.593127204 | -0.001794877 | -5.523156076 | 6.65E-06 | 0.039556297 | chr15 | 98631681  |
| cg11753155    | 0.094166023 | 0.001437609  | 5.51921389   | 6.72E-06 | 0.039556297 | chr6  | 29760148  |
| cg09790780    | 0.868882545 | -0.000279469 | -5.511484849 | 6.87E-06 | 0.039556297 | chr16 | 7482013   |
| cg11419575    | 0.932036512 | -0.001042904 | -5.511368989 | 6.87E-06 | 0.039556297 | chr2  | 153057378 |
| cg07834476    | 0.046441822 | 0.000244673  | 5.505235676  | 6.98E-06 | 0.039748761 | chr10 | 25305695  |
| cg15714607    | 0.076449231 | 0.000839988  | 5.461041203  | 7.88E-06 | 0.044308765 | chr11 | 75526013  |
| cg00536383    | 0.065423596 | 0.000799665  | 5.439037952  | 8.36E-06 | 0.046504432 | chr2  | 9346592   |
| cg15861540    | 0.088759863 | 0.000275173  | 5.395163826  | 9.43E-06 | 0.051814471 | chr19 | 3606463   |
| cg24737193    | 0.897404385 | -0.001018335 | -5.382602384 | 9.75E-06 | 0.053016958 | chr18 | 12778029  |
| cg17924813    | 0.134474248 | 0.000475996  | 5.333877422  | 1.11E-05 | 0.059220325 | chr4  | 15704844  |
| ch.12.859106F | 0.108930101 | -0.000229314 | -5.334056782 | 1.11E-05 | 0.059220325 | chr12 | 42882094  |
| cg00984474    | 0.214047937 | -0.000465545 | -5.314147629 | 1.18E-05 | 0.061816063 | chr5  | 7850922   |



|            |             |              |              |          |             |       |           |
|------------|-------------|--------------|--------------|----------|-------------|-------|-----------|
| cg22466043 | 0.036028665 | 0.001443976  | 5.303692282  | 1.21E-05 | 0.062921129 | chr10 | 38692145  |
| cg21193744 | 0.933520485 | -0.001203821 | -5.290677739 | 1.25E-05 | 0.064502532 | chr8  | 6405105   |
| cg13168820 | 0.129993803 | 0.000340323  | 5.273340292  | 1.31E-05 | 0.066916496 | chr20 | 41818356  |
| cg11298989 | 0.022287439 | 0.000229387  | 5.257909472  | 1.37E-05 | 0.069068611 | chr19 | 54960853  |
| cg27121529 | 0.04777533  | 0.000287343  | 5.249666629  | 1.40E-05 | 0.069912414 | chr7  | 99102251  |
| cg01810111 | 0.098625023 | 0.000675412  | 5.217344121  | 1.53E-05 | 0.07558476  | chr6  | 27637395  |
| cg15946590 | 0.334291769 | 0.000973453  | 5.204088154  | 1.59E-05 | 0.077580004 | chr6  | 30421089  |
| cg07301433 | 0.183595193 | -0.000552222 | -5.192995488 | 1.64E-05 | 0.079167117 | chr2  | 38303999  |
| cg11226480 | 0.033235333 | 0.000366614  | 5.1884756    | 1.66E-05 | 0.079357135 | chr12 | 51442072  |
| cg17093826 | 0.834498367 | 0.000328261  | 5.183929628  | 1.68E-05 | 0.079561112 | chr7  | 138458720 |
| cg02599587 | 0.8867479   | -0.000295687 | -5.16708152  | 1.76E-05 | 0.082500237 | chr5  | 153275285 |
| cg09635053 | 0.058472989 | 0.000870174  | 5.115945361  | 2.02E-05 | 0.0939614   | chr16 | 1031944   |
| cg25921736 | 0.848271035 | -0.000360112 | -5.10790294  | 2.06E-05 | 0.09441414  | chr7  | 139971436 |
| cg12871376 | 0.728546023 | -0.000810979 | -5.107217768 | 2.07E-05 | 0.09441414  | chr6  | 41716240  |
| cg08506127 | 0.723385109 | -0.000621008 | -5.101908231 | 2.10E-05 | 0.094899089 | chr2  | 87018958  |
| cg00323861 | 0.961745364 | -0.002405434 | -5.063366856 | 2.33E-05 | 0.103577742 | chr4  | 70155747  |
| cg18339359 | 1.05530747  | -0.003702409 | -5.063122382 | 2.33E-05 | 0.103577742 | chr8  | 23423757  |
| cg20009461 | 0.93996791  | 0.000108164  | 5.053701962  | 2.39E-05 | 0.104365053 | chr17 | 80560634  |
| cg22272840 | 0.251290957 | 0.00111238   | 5.054962875  | 2.39E-05 | 0.104365053 | chr8  | 10586882  |
| cg04007531 | 0.093946093 | 0.001708624  | 5.041905524  | 2.47E-05 | 0.106823502 | chr6  | 29933511  |
| cg12601945 | 0.141282573 | 0.000598153  | 5.020752127  | 2.62E-05 | 0.112182347 | chr1  | 18958924  |
| cg18538138 | 0.915956922 | 0.000256249  | 5.013374924  | 2.67E-05 | 0.113464058 | chr2  | 33604572  |
| cg13934625 | 0.34369677  | -0.000645956 | -5.008161131 | 2.71E-05 | 0.114092373 | chr15 | 52472770  |
| cg06068179 | 0.981427178 | -0.001610229 | -4.99359832  | 2.82E-05 | 0.117703629 | chr4  | 7814047   |
| cg21816685 | 0.097115529 | 0.00041199   | 4.982199339  | 2.91E-05 | 0.120392253 | chr8  | 2023317   |
| cg11181587 | 0.832692382 | -0.000427394 | -4.947875743 | 3.20E-05 | 0.13012729  | chr10 | 121772185 |
| cg12254517 | 0.827643066 | -0.001018672 | -4.947563938 | 3.20E-05 | 0.13012729  | chr12 | 93454991  |
| cg11814464 | 0.116662591 | 0.000383607  | 4.910578418  | 3.54E-05 | 0.142776032 | chr18 | 7567548   |
| cg16364155 | 0.909163446 | -0.000462254 | -4.900578481 | 3.64E-05 | 0.143447304 | chr3  | 147144980 |
| cg25006249 | 0.908276343 | -0.001340334 | -4.901020371 | 3.64E-05 | 0.143447304 | chr20 | 259898    |
| cg03698374 | 0.778885228 | -0.001608698 | -4.899832223 | 3.65E-05 | 0.143447304 | chr4  | 1362912   |
| cg16769381 | 0.93313552  | 0.000137472  | 4.887209582  | 3.78E-05 | 0.147287077 | chr11 | 46391053  |
| cg13225413 | 0.163132016 | 0.000520892  | 4.881033621  | 3.84E-05 | 0.148596926 | chr17 | 5015653   |
| cg17529745 | 0.857542225 | 0.000187035  | 4.872982534  | 3.92E-05 | 0.150660718 | chr10 | 131708358 |
| cg09911982 | 0.142222525 | -0.000292841 | -4.870183088 | 3.96E-05 | 0.150660718 | chr6  | 33216283  |
| cg15908308 | 0.869143781 | -0.000312865 | -4.856617533 | 4.10E-05 | 0.155131816 | chr4  | 43459582  |
| cg23941963 | 0.863877849 | 0.000185353  | 4.847368198  | 4.21E-05 | 0.157871195 | chr7  | 204401    |
| cg10189774 | 0.42861117  | -0.000587286 | -4.839765531 | 4.30E-05 | 0.159946821 | chr4  | 17578691  |
| cg15504747 | 0.058694223 | 0.000557087  | 4.819578244  | 4.54E-05 | 0.167648751 | chr3  | 129312979 |
| cg05345996 | 0.886603825 | -0.000423924 | -4.816975988 | 4.57E-05 | 0.167648751 | chr10 | 133508028 |
| cg17214754 | 0.869726442 | 0.00024993   | 4.800389931  | 4.79E-05 | 0.174105002 | chr11 | 3168993   |
| cg11401278 | 0.816926258 | 0.000324495  | 4.794614033  | 4.86E-05 | 0.175320554 | chr11 | 2140096   |
| cg06398643 | 0.905602326 | 0.000224261  | 4.792383265  | 4.89E-05 | 0.175320554 | chr3  | 187896120 |
| cg24631102 | 0.858489572 | -0.000438155 | -4.766771088 | 5.25E-05 | 0.186648898 | chr10 | 129349644 |
| cg13885748 | 0.113837676 | 0.000308374  | 4.76062045   | 5.34E-05 | 0.188426869 | chr9  | 112232127 |
| cg02679503 | 0.840303571 | -0.000404346 | -4.757629012 | 5.38E-05 | 0.188596739 | chr2  | 42794680  |
| cg16092346 | 0.945388778 | -0.001382178 | -4.754224728 | 5.43E-05 | 0.188989705 | chr4  | 1363885   |

|            |             |              |              |          |             |       |           |
|------------|-------------|--------------|--------------|----------|-------------|-------|-----------|
| cg08352786 | 0.820009568 | -0.000661013 | -4.748528717 | 5.52E-05 | 0.190582855 | chr12 | 81100403  |
| cg04831495 | 0.948532415 | -0.000278099 | -4.738353511 | 5.67E-05 | 0.194565546 | chr15 | 85060580  |
| cg11265952 | 0.766522791 | 0.00022881   | 4.732814918  | 5.76E-05 | 0.196140819 | chr3  | 57231292  |
| cg19216044 | 0.960500897 | -0.000210865 | -4.728137945 | 5.83E-05 | 0.197273639 | chr1  | 155005184 |

**Supplementary Table S3: CpGs associated with PRL levels in PCOS patients**

| Row.names  | intercept    | beta         | t            | pval     | qval     | chr   | pos       |
|------------|--------------|--------------|--------------|----------|----------|-------|-----------|
| cg23339709 | 0.923410434  | -0.002325525 | -11.25788401 | 6.61E-12 | 2.40E-06 | chr11 | 56258485  |
| cg01847062 | 0.98549583   | -0.008133101 | -11.02809638 | 1.06E-11 | 2.40E-06 | chr17 | 79792936  |
| cg12046183 | 0.914340973  | -0.005740527 | -10.7056511  | 2.09E-11 | 2.40E-06 | chr6  | 29859829  |
| cg08017858 | 0.006825524  | 0.00797058   | 10.69719858  | 2.13E-11 | 2.40E-06 | chr11 | 74022642  |
| cg00409917 | -0.001181505 | 0.003318406  | 10.626565    | 2.47E-11 | 2.40E-06 | chr6  | 29894679  |
| cg01062395 | 0.018308832  | 0.006598113  | 10.51334641  | 3.15E-11 | 2.55E-06 | chr6  | 29855636  |
| cg26649688 | 0.963318606  | -0.004027965 | -10.31511746 | 4.83E-11 | 2.90E-06 | chr6  | 29858360  |
| cg21557672 | 0.881455124  | -0.003180453 | -10.31196644 | 4.86E-11 | 2.90E-06 | chr19 | 34315334  |
| cg23238734 | 0.975924954  | -0.003366653 | -10.24856415 | 5.58E-11 | 2.90E-06 | chr17 | 78661607  |
| cg06655494 | 0.958887841  | -0.003041032 | -10.20408913 | 6.15E-11 | 2.90E-06 | chr7  | 5415468   |
| cg08186575 | 0.971461468  | -0.003710828 | -10.17364661 | 6.57E-11 | 2.90E-06 | chr19 | 4371730   |
| cg18274896 | 0.976863355  | -0.003649976 | -10.09057804 | 7.88E-11 | 3.19E-06 | chr9  | 140395754 |
| cg05611414 | 0.936897663  | -0.003520704 | -10.01830302 | 9.24E-11 | 3.24E-06 | chr19 | 50643613  |
| cg18805486 | 0.924095193  | -0.004306019 | -9.986858685 | 9.91E-11 | 3.24E-06 | chr8  | 12551033  |
| cg02632583 | 0.98336161   | -0.002955336 | -9.953417083 | 1.07E-10 | 3.24E-06 | chr17 | 79253990  |
| cg12619747 | 0.96193994   | -0.004958517 | -9.937075597 | 1.11E-10 | 3.24E-06 | chr8  | 55180538  |
| cg26353469 | 0.067382582  | 0.003384913  | 9.925609531  | 1.13E-10 | 3.24E-06 | chr6  | 29855970  |
| cg21331461 | 0.117129758  | 0.004510007  | 9.889338665  | 1.23E-10 | 3.25E-06 | chr12 | 21927773  |
| cg24179288 | 0.961297687  | -0.002654475 | -9.85120255  | 1.34E-10 | 3.25E-06 | chr6  | 29867285  |
| cg06064954 | 0.949513077  | -0.003583791 | -9.819278914 | 1.44E-10 | 3.25E-06 | chr6  | 29869838  |
| cg07811074 | 0.965133353  | -0.003864891 | -9.812616556 | 1.46E-10 | 3.25E-06 | chr2  | 98350847  |
| cg16223220 | 0.013781763  | 0.006213929  | 9.808351141  | 1.47E-10 | 3.25E-06 | chr6  | 29855914  |
| cg08231349 | 0.047125872  | 0.004140812  | 9.758562068  | 1.65E-10 | 3.34E-06 | chr6  | 29894644  |
| cg18423635 | 0.997192502  | -0.003684488 | -9.757292344 | 1.65E-10 | 3.34E-06 | chr6  | 29869936  |
| cg00598600 | 0.940960254  | -0.004606751 | -9.64953085  | 2.10E-10 | 4.08E-06 | chr8  | 12610812  |
| cg23266747 | 0.925513915  | -0.003088461 | -9.591212846 | 2.40E-10 | 4.44E-06 | chr14 | 73168082  |
| cg12801256 | 0.922098866  | -0.003206231 | -9.578592628 | 2.47E-10 | 4.44E-06 | chr2  | 107459860 |
| cg26419287 | 0.93777886   | -0.00375833  | -9.529247029 | 2.76E-10 | 4.79E-06 | chr14 | 52482697  |
| cg01101677 | 0.951165698  | -0.004005535 | -9.502842029 | 2.93E-10 | 4.91E-06 | chr2  | 44313980  |
| cg05989746 | 0.96365687   | -0.003310684 | -9.406513381 | 3.65E-10 | 5.91E-06 | chr2  | 3425584   |
| cg07754829 | 0.976021219  | -0.001817582 | -9.336612325 | 4.28E-10 | 6.71E-06 | chr8  | 12551103  |
| cg10148293 | 0.875820951  | -0.002475955 | -9.316594586 | 4.48E-10 | 6.80E-06 | chr10 | 37413676  |
| cg07273125 | 0.096909656  | 0.002503676  | 9.301960627  | 4.64E-10 | 6.82E-06 | chr16 | 68295692  |
| cg01718254 | 0.186596246  | 0.003328913  | 9.266358049  | 5.03E-10 | 7.16E-06 | chr14 | 103995324 |
| cg14893857 | 0.075062411  | 0.001782347  | 9.255489279  | 5.16E-10 | 7.16E-06 | chr14 | 102554969 |
| cg20578893 | 0.947236454  | -0.003112739 | -9.212532593 | 5.70E-10 | 7.69E-06 | chr6  | 29870060  |
| cg04459091 | 0.957980519  | -0.003459861 | -9.185006838 | 6.07E-10 | 7.97E-06 | chr5  | 179751794 |
| cg11079354 | 0.110958023  | 0.003783977  | 9.16785279   | 6.32E-10 | 8.07E-06 | chr6  | 27740361  |
| cg21549632 | 0.062537574  | 0.004656969  | 9.133801089  | 6.84E-10 | 8.51E-06 | chr6  | 29856287  |
| cg05074385 | 0.948113548  | -0.002660126 | -9.122567923 | 7.02E-10 | 8.52E-06 | chr6  | 30137208  |

|            |             |              |              |          |             |       |           |
|------------|-------------|--------------|--------------|----------|-------------|-------|-----------|
| cg00453190 | 0.963315174 | -0.00490928  | -9.107026891 | 7.28E-10 | 8.62E-06    | chr7  | 149460972 |
| cg17865718 | 0.917809725 | -0.003111162 | -9.032321679 | 8.66E-10 | 9.92E-06    | chr3  | 103926553 |
| cg16555341 | 0.081027951 | 0.001489833  | 9.021489138  | 8.88E-10 | 9.92E-06    | chr16 | 89160798  |
| cg14230280 | 0.900521617 | -0.002840325 | -9.015612816 | 9.00E-10 | 9.92E-06    | chr9  | 132502800 |
| cg14667780 | 0.95433935  | -0.002894131 | -9.006714755 | 9.19E-10 | 9.92E-06    | chr2  | 174613232 |
| cg02223784 | 0.861663473 | -0.002609368 | -8.993345632 | 9.49E-10 | 1.00E-05    | chr7  | 128589932 |
| cg07983869 | 0.909674197 | -0.002752721 | -8.960044355 | 1.03E-09 | 1.05E-05    | chr19 | 17802633  |
| cg10474018 | 0.958955118 | -0.002496225 | -8.955458875 | 1.04E-09 | 1.05E-05    | chr6  | 29860016  |
| cg03177972 | 0.98901795  | -0.003025034 | -8.944923924 | 1.06E-09 | 1.05E-05    | chr11 | 78480035  |
| cg01793445 | 0.87412433  | -0.003118531 | -8.907628638 | 1.16E-09 | 1.11E-05    | chr1  | 167632415 |
| cg22354618 | 0.96242222  | -0.002588483 | -8.906080842 | 1.16E-09 | 1.11E-05    | chr18 | 8800458   |
| cg01723291 | 0.075296682 | 0.004346303  | 8.894500799  | 1.20E-09 | 1.12E-05    | chr6  | 29855890  |
| cg00943269 | 0.905953439 | -0.001504248 | -8.819466163 | 1.43E-09 | 1.31E-05    | chr8  | 12550523  |
| cg18325044 | 0.955198606 | -0.002049413 | -8.77151514  | 1.60E-09 | 1.44E-05    | chr6  | 29868900  |
| cg01876435 | 0.895887313 | -0.002671208 | -8.756739164 | 1.66E-09 | 1.46E-05    | chr8  | 12545609  |
| cg02227034 | 0.95537738  | -0.002757632 | -8.711178691 | 1.84E-09 | 1.59E-05    | chr10 | 128080679 |
| cg14973360 | 0.965421987 | -0.004077322 | -8.705077519 | 1.87E-09 | 1.59E-05    | chr2  | 9800511   |
| cg01398709 | 0.86769668  | -0.004488268 | -8.629827287 | 2.24E-09 | 1.87E-05    | chr3  | 13918750  |
| cg03593259 | 0.078320123 | 0.002680631  | 8.55950044   | 2.65E-09 | 2.18E-05    | chr11 | 63321562  |
| cg13946128 | 0.919691188 | -0.004696372 | -8.552174058 | 2.70E-09 | 2.18E-05    | chr1  | 52372768  |
| cg20537760 | 0.88579465  | -0.003220536 | -8.508360043 | 3.00E-09 | 2.38E-05    | chr18 | 77534274  |
| cg24528297 | 0.055884572 | 0.001646642  | 8.500500674  | 3.05E-09 | 2.39E-05    | chr14 | 103995361 |
| cg04939944 | 0.981243533 | -0.00364283  | -8.482802363 | 3.19E-09 | 2.45E-05    | chr7  | 5390509   |
| cg07831312 | 0.921982722 | -0.003525331 | -8.396419989 | 3.92E-09 | 2.98E-05    | chr7  | 30855293  |
| cg03995122 | 0.027878421 | 0.002281879  | 8.340062888  | 4.50E-09 | 3.36E-05    | chr6  | 29894642  |
| cg22945457 | 0.783841266 | -0.002782118 | -8.311040983 | 4.82E-09 | 3.55E-05    | chr1  | 225612608 |
| cg14117565 | 0.996834853 | -0.009102028 | -8.304689293 | 4.90E-09 | 3.55E-05    | chr19 | 51850506  |
| cg26127187 | 0.941395894 | -0.003638573 | -8.257299416 | 5.50E-09 | 3.93E-05    | chr6  | 29856795  |
| cg02687592 | 0.848986376 | -0.003093388 | -8.06838964  | 8.73E-09 | 6.14E-05    | chr22 | 44708843  |
| cg14667175 | 0.849444855 | -0.002717311 | -8.020032681 | 9.84E-09 | 6.81E-05    | chr2  | 111623300 |
| cg02523305 | 0.917403021 | -0.003294413 | -8.015105902 | 9.96E-09 | 6.81E-05    | chr3  | 33263532  |
| cg08545169 | 0.907243528 | -0.001405803 | -7.997647829 | 1.04E-08 | 7.01E-05    | chr1  | 161169143 |
| cg19617213 | 0.099869575 | 0.002344276  | 7.979895485  | 1.09E-08 | 7.22E-05    | chr19 | 1074926   |
| cg15944026 | 0.119332817 | 0.002164169  | 7.882586644  | 1.38E-08 | 9.07E-05    | chr14 | 91883673  |
| cg06451157 | 0.935929498 | -0.001695081 | -7.873892837 | 1.41E-08 | 9.14E-05    | chr6  | 29868295  |
| cg26965779 | 0.60414042  | -0.00413718  | -7.829559537 | 1.58E-08 | 0.000100155 | chr6  | 29854089  |
| cg08527435 | 0.875768342 | -0.002675845 | -7.82676586  | 1.59E-08 | 0.000100155 | chr19 | 2200504   |
| cg12998850 | 0.11986598  | 0.001545831  | 7.614691339  | 2.70E-08 | 0.000168189 | chr6  | 29894946  |
| cg11086883 | 0.557438738 | -0.003588079 | -7.596788883 | 2.83E-08 | 0.000173171 | chr6  | 29908891  |
| cg08661164 | 0.849490099 | -0.002406106 | -7.59305842  | 2.85E-08 | 0.000173171 | chr1  | 93301669  |
| cg04614203 | 0.563177139 | -0.001781373 | -7.57557512  | 2.98E-08 | 0.000178744 | chrX  | 55114262  |
| cg22167763 | 0.887249686 | -0.002826962 | -7.498662376 | 3.62E-08 | 0.000214463 | chr13 | 95315772  |
| cg10804687 | 0.955599083 | -0.001487851 | -7.463057535 | 3.96E-08 | 0.000231893 | chr6  | 29859520  |
| cg25650661 | 0.100941361 | 0.001609956  | 7.442407358  | 4.18E-08 | 0.000241465 | chr6  | 29856278  |
| cg22956635 | 0.975757794 | -0.002854309 | -7.380301859 | 4.89E-08 | 0.000279462 | chr17 | 56566398  |
| cg13946520 | 0.095467324 | 0.001748323  | 7.356583621  | 5.20E-08 | 0.000293426 | chr2  | 87017689  |

|            |             |              |              |          |             |       |           |
|------------|-------------|--------------|--------------|----------|-------------|-------|-----------|
| cg14449180 | 0.109252657 | 0.002217793  | 7.326107969  | 5.62E-08 | 0.000313514 | chr6  | 29894619  |
| cg14766769 | 0.754409595 | -0.002209626 | -7.299549423 | 6.01E-08 | 0.00033172  | chr9  | 125874000 |
| cg17924072 | 0.115567047 | 0.001828031  | 7.294686825  | 6.09E-08 | 0.000332097 | chr19 | 1075067   |
| cg21836699 | 0.911261366 | -0.001472    | -7.240950969 | 6.99E-08 | 0.00037686  | chr4  | 9557805   |
| cg21810411 | 0.974657957 | -0.007308597 | -7.234503458 | 7.10E-08 | 0.000378933 | chr6  | 32549139  |
| cg06517984 | 0.879962938 | -0.001196699 | -7.204715381 | 7.67E-08 | 0.000404597 | chr8  | 143407646 |
| cg05088017 | 0.856357281 | -0.002504125 | -7.160234685 | 8.60E-08 | 0.000448742 | chr15 | 22368957  |
| cg01388630 | 0.968328655 | -0.00733015  | -7.112018414 | 9.73E-08 | 0.000502698 | chr6  | 29817024  |
| cg25023257 | 0.934770581 | -0.001647131 | -7.091748339 | 1.03E-07 | 0.000524118 | chr1  | 203146223 |
| cg02050694 | 0.125468346 | 0.002790783  | 7.058491327  | 1.12E-07 | 0.000565197 | chr9  | 14346393  |
| cg05834805 | 0.103843588 | 0.001380388  | 7.049792625  | 1.14E-07 | 0.000572097 | chr9  | 123631524 |
| cg20451455 | 0.875133306 | -0.003198385 | -7.029911954 | 1.20E-07 | 0.000596154 | chr1  | 3449825   |
| cg15697453 | 0.502760367 | -0.001665995 | -7.013280216 | 1.26E-07 | 0.000616108 | chr6  | 31323985  |
| cg15909951 | 0.092348646 | 0.000741771  | 6.96719478   | 1.42E-07 | 0.000687384 | chr2  | 242743702 |
| cg13470719 | 0.755037215 | -0.002304518 | -6.932595454 | 1.55E-07 | 0.000744591 | chr7  | 157004224 |
| cg07291958 | 0.081874288 | 0.001325477  | 6.922748247  | 1.59E-07 | 0.000756416 | chr2  | 26785531  |
| cg07731312 | 0.890214652 | -0.000777394 | -6.88507357  | 1.75E-07 | 0.000826261 | chr16 | 88887321  |
| cg14382215 | 0.81167243  | -0.001961227 | -6.805289827 | 2.16E-07 | 0.001007737 | chr1  | 161169007 |
| cg22989463 | 0.915630564 | -0.001811943 | -6.800705103 | 2.18E-07 | 0.001010175 | chr8  | 12550605  |
| cg03036047 | 0.946668321 | -0.007087916 | -6.783323934 | 2.29E-07 | 0.001047185 | chr6  | 32362744  |
| cg04214430 | 0.874415473 | 0.001036927  | 6.769622351  | 2.37E-07 | 0.001075275 | chr13 | 50702707  |
| cg04917511 | 0.044928388 | 0.002435103  | 6.740394673  | 2.56E-07 | 0.001143834 | chr2  | 26785460  |
| cg20465661 | 0.886556787 | -0.002592404 | -6.738958117 | 2.57E-07 | 0.001143834 | chr1  | 248551409 |
| cg05095290 | 0.205142571 | 0.002751738  | 6.709762552  | 2.77E-07 | 0.00121627  | chr14 | 103995143 |
| cg17431052 | 0.14457338  | 0.001655204  | 6.708615417  | 2.78E-07 | 0.00121627  | chr19 | 37742481  |
| cg03742947 | 0.105790242 | 0.000814475  | 6.654511787  | 3.21E-07 | 0.001389534 | chr6  | 29856275  |
| cg23619824 | 0.929118928 | -0.000498618 | -6.640960718 | 3.32E-07 | 0.001417162 | chr10 | 133274140 |
| cg10150686 | 0.046468125 | 0.002708313  | 6.637956414  | 3.35E-07 | 0.001417162 | chr2  | 26785332  |
| cg13667021 | 0.905294491 | -0.002371802 | -6.636982411 | 3.36E-07 | 0.001417162 | chr11 | 124311423 |
| cg04373948 | 0.784264643 | -0.003027603 | -6.564547663 | 4.06E-07 | 0.001697753 | chr12 | 90806795  |
| cg25043378 | 0.763283027 | -0.002425439 | -6.561905767 | 4.09E-07 | 0.001697753 | chr8  | 41522857  |
| cg14761252 | 0.09153213  | 0.001601376  | 6.542065019  | 4.31E-07 | 0.001773914 | chr18 | 71815123  |
| cg25668922 | 0.110539345 | 0.000678789  | 6.360939757  | 6.97E-07 | 0.002842935 | chr5  | 34656126  |
| cg23533270 | 0.80369607  | -0.002843815 | -6.317957981 | 7.81E-07 | 0.003160894 | chr10 | 78635553  |
| cg26133206 | 0.107519123 | -0.000725855 | -6.294124679 | 8.32E-07 | 0.003340285 | chr5  | 133861746 |
| cg05019905 | 0.116206299 | 0.002620094  | 6.281735207  | 8.60E-07 | 0.003424159 | chr6  | 29894831  |
| cg12477902 | 0.118986226 | 0.001341872  | 6.269535264  | 8.89E-07 | 0.003508649 | chr19 | 44599083  |
| cg00879843 | 0.084212113 | 0.000647233  | 6.241988783  | 9.57E-07 | 0.003745864 | chr6  | 33239764  |
| cg03091512 | 0.063351544 | 0.000911903  | 6.18182351   | 1.12E-06 | 0.004347943 | chr2  | 227701050 |
| cg14093630 | 0.149284409 | -0.000961515 | -6.180237109 | 1.13E-06 | 0.004347943 | chr9  | 15423618  |
| cg15547734 | 0.93231441  | -0.000863484 | -6.163797757 | 1.18E-06 | 0.004503819 | chr5  | 45262443  |
| cg07418114 | 0.785825968 | -0.00160756  | -6.161191731 | 1.19E-06 | 0.004503819 | chr1  | 156836717 |
| cg15931205 | 0.160724939 | 0.003341091  | 6.126381878  | 1.30E-06 | 0.004905636 | chr6  | 29894820  |
| cg16896847 | 0.060169672 | 0.001468019  | 6.050937448  | 1.60E-06 | 0.005960118 | chr8  | 144512042 |
| cg05299140 | 0.813821704 | -0.003565115 | -6.025143509 | 1.71E-06 | 0.006339127 | chr17 | 47972401  |
| cg05581880 | 0.927492565 | -0.001341432 | -6.017877232 | 1.74E-06 | 0.00641521  | chr7  | 224681    |



|            |             |              |              |          |             |       |           |
|------------|-------------|--------------|--------------|----------|-------------|-------|-----------|
| cg04023150 | 0.044194338 | 0.001003149  | 6.014278858  | 1.76E-06 | 0.00642888  | chr1  | 44873064  |
| cg25623768 | 0.118836824 | 0.002357002  | 5.952503948  | 2.08E-06 | 0.007535102 | chr2  | 45241008  |
| cg16832267 | 0.130913979 | 0.002148988  | 5.908772827  | 2.34E-06 | 0.008414941 | chr2  | 18060102  |
| cg00599809 | 0.86203332  | -0.001223808 | -5.895589996 | 2.42E-06 | 0.008640461 | chr7  | 72411550  |
| cg23092777 | 0.060654055 | 0.000724424  | 5.893516802  | 2.44E-06 | 0.008640461 | chr12 | 72057772  |
| cg15631337 | 0.072270047 | 0.000629118  | 5.868250728  | 2.61E-06 | 0.009183192 | chr17 | 46048070  |
| cg14344315 | 0.08761901  | 0.000979463  | 5.838558648  | 2.83E-06 | 0.009878381 | chr15 | 31733445  |
| cg05049361 | 0.103341681 | 0.001306761  | 5.795058362  | 3.18E-06 | 0.011031733 | chr14 | 69726536  |
| cg06212289 | 0.138909453 | 0.001036915  | 5.78249591   | 3.29E-06 | 0.011264362 | chr6  | 170606058 |
| cg17583158 | 0.872685664 | -0.003351996 | -5.782100863 | 3.29E-06 | 0.011264362 | chr8  | 2037874   |
| cg25662463 | 0.092764752 | 0.001369246  | 5.778123722  | 3.33E-06 | 0.01130661  | chr10 | 118897857 |
| cg10151583 | 0.893772105 | -0.001223373 | -5.737542241 | 3.72E-06 | 0.012531927 | chr16 | 88460502  |
| cg09258813 | 0.11733558  | 0.002004469  | 5.72214111   | 3.88E-06 | 0.012975714 | chr8  | 37823409  |
| cg18875551 | 0.948530183 | -0.000428601 | -5.68355517  | 4.30E-06 | 0.014307665 | chr1  | 24967164  |
| cg24793642 | 0.747818058 | -0.003370601 | -5.674079668 | 4.41E-06 | 0.014580233 | chr8  | 57351185  |
| cg26230285 | 0.090621705 | 0.001164179  | 5.638193561  | 4.87E-06 | 0.015962711 | chr15 | 26108412  |
| cg02149708 | 0.114233734 | 0.000785708  | 5.601774517  | 5.37E-06 | 0.017503642 | chr6  | 166582159 |
| cg02737759 | 0.087075912 | 0.000506665  | 5.586412124  | 5.60E-06 | 0.01812794  | chr12 | 72057786  |
| cg04460984 | 0.13153616  | 0.001317538  | 5.578810956  | 5.72E-06 | 0.018383696 | chr15 | 78933630  |
| cg13617889 | 0.082900189 | 0.001396906  | 5.559412896  | 6.03E-06 | 0.019251451 | chr15 | 31733101  |
| cg25149122 | 0.737303898 | -0.002494002 | -5.509560714 | 6.90E-06 | 0.021902705 | chr18 | 74201231  |
| cg17636541 | 0.064957284 | 0.000544678  | 5.493951516  | 7.20E-06 | 0.022704689 | chr6  | 30658493  |
| cg03182504 | 0.082141817 | -0.000401077 | -5.490685815 | 7.27E-06 | 0.0227596   | chr7  | 144532459 |
| cg27589088 | 0.042376481 | 0.00158068   | 5.478647325  | 7.51E-06 | 0.023367002 | chr16 | 80966033  |
| cg19334406 | 0.942167223 | -0.00053392  | -5.473377616 | 7.62E-06 | 0.02355366  | chr11 | 126319635 |
| cg14455307 | 0.055059452 | 0.000398969  | 5.470302296  | 7.68E-06 | 0.023601369 | chr18 | 60987429  |
| cg17861154 | 0.162777958 | 0.000815029  | 5.464381808  | 7.81E-06 | 0.02383406  | chr10 | 102509693 |
| cg25226657 | 0.052330079 | 0.003594178  | 5.460833773  | 7.88E-06 | 0.023915032 | chr5  | 149110983 |
| cg02603304 | 0.904568683 | -0.000810497 | -5.457990582 | 7.94E-06 | 0.023951213 | chr6  | 29865979  |
| cg19633205 | 0.277998136 | 0.003030554  | 5.452785238  | 8.06E-06 | 0.024143196 | chr1  | 35544470  |
| cg13056744 | 0.070928104 | 0.0022588    | 5.429470453  | 8.58E-06 | 0.025568352 | chr6  | 29894940  |
| cg22488268 | 0.132174271 | 0.001239858  | 5.420770332  | 8.79E-06 | 0.025996228 | chr7  | 1498641   |
| cg02021485 | 0.886470099 | -0.000885423 | -5.418903167 | 8.83E-06 | 0.025996228 | chr11 | 65959730  |
| cg14190889 | 0.643665645 | -0.004237184 | -5.41245068  | 8.99E-06 | 0.026297966 | chr6  | 29854174  |
| cg00369443 | 0.907781694 | -0.001861929 | -5.398024981 | 9.35E-06 | 0.027188669 | chr7  | 157918647 |
| cg23130010 | 0.173066886 | 0.00234084   | 5.365656134  | 1.02E-05 | 0.029520193 | chr6  | 29855462  |
| cg27580026 | 0.079909745 | 0.001125994  | 5.349179782  | 1.07E-05 | 0.030694162 | chr2  | 27717965  |
| cg08934976 | 0.929530545 | -0.000400919 | -5.335793983 | 1.11E-05 | 0.031515393 | chr5  | 1264529   |
| cg20839522 | 0.93645383  | -0.003638821 | -5.334470419 | 1.11E-05 | 0.031515393 | chr4  | 132649479 |
| cg22819767 | 0.884815026 | -0.001235815 | -5.333048994 | 1.12E-05 | 0.031515393 | chr10 | 11866910  |
| cg01336390 | 0.259094174 | 0.002990316  | 5.323027992  | 1.15E-05 | 0.03208135  | chr6  | 29895059  |
| cg03339321 | 0.866078076 | -0.00327321  | -5.322287145 | 1.15E-05 | 0.03208135  | chr6  | 30080642  |
| cg06407657 | 0.876292765 | -0.000716819 | -5.318242698 | 1.16E-05 | 0.032251962 | chr20 | 43937138  |
| cg19707379 | 0.970318371 | -0.000794704 | -5.311092321 | 1.19E-05 | 0.032700518 | chr17 | 78882693  |
| cg27153492 | 0.121151376 | 0.002333435  | 5.304017771  | 1.21E-05 | 0.033149576 | chr18 | 13801010  |



|            |             |              |              |          |             |       |           |
|------------|-------------|--------------|--------------|----------|-------------|-------|-----------|
| cg07237326 | 0.121431664 | 0.00227122   | 5.277255125  | 1.30E-05 | 0.035414151 | chr19 | 37742739  |
| cg26220528 | 0.05026994  | 0.00106936   | 5.275689039  | 1.31E-05 | 0.035414151 | chr12 | 57623348  |
| cg09335658 | 0.791837037 | -0.00236892  | -5.264847076 | 1.34E-05 | 0.036275319 | chr7  | 127961612 |
| cg18052778 | 0.857756017 | -0.000541725 | -5.257578    | 1.37E-05 | 0.036584781 | chr17 | 46030312  |
| cg27133432 | 0.920123594 | 0.00071672   | 5.257094357  | 1.37E-05 | 0.036584781 | chr15 | 63026360  |
| cg09086151 | 0.942467846 | -0.001378821 | -5.255681266 | 1.38E-05 | 0.036584781 | chr6  | 32550067  |
| cg16587443 | 0.189279625 | -0.001189885 | -5.24385661  | 1.42E-05 | 0.037376759 | chr4  | 144434046 |
| cg25130590 | 0.968246967 | -0.007199049 | -5.244236249 | 1.42E-05 | 0.037376759 | chr18 | 77110161  |
| cg01379290 | 0.763159542 | -0.001147952 | -5.206643285 | 1.58E-05 | 0.041152713 | chr2  | 240679638 |
| cg25797055 | 0.066262269 | 0.001401381  | 5.204047629  | 1.59E-05 | 0.041223893 | chr4  | 141490097 |
| cg12407979 | 0.631341352 | -0.002121991 | -5.18524671  | 1.67E-05 | 0.043165623 | chr11 | 104817914 |
| cg12013713 | 0.77064011  | -0.00113032  | -5.181236709 | 1.69E-05 | 0.043410213 | chr7  | 139760671 |
| cg01962869 | 0.109759133 | 0.000736063  | 5.165215334  | 1.77E-05 | 0.045113951 | chr5  | 172482723 |
| cg06181784 | 0.08049117  | 0.000707046  | 5.158086586  | 1.80E-05 | 0.045760491 | chr3  | 9993934   |
| cg18477943 | 0.9619185   | -0.00179747  | -5.151692423 | 1.83E-05 | 0.04632453  | chr3  | 66002958  |
| cg12008501 | 0.917225983 | -0.000470675 | -5.145012651 | 1.87E-05 | 0.046875485 | chr2  | 208678058 |
| cg25071520 | 0.161717442 | 0.000685464  | 5.143573721  | 1.87E-05 | 0.046875485 | chr16 | 49910333  |
| cg01499815 | 0.096169419 | 0.003215416  | 5.136612529  | 1.91E-05 | 0.047530766 | chr6  | 29895074  |
| cg26140688 | 0.155258019 | 0.001056304  | 5.12903875   | 1.95E-05 | 0.048277272 | chr21 | 33245471  |
| cg08534175 | 0.858182739 | -0.001578904 | -5.120460752 | 2.00E-05 | 0.049171599 | chr16 | 2964815   |
| cg24668883 | 0.854755145 | -0.001226592 | -5.117375996 | 2.01E-05 | 0.049222008 | chr5  | 17257844  |
| cg21279316 | 0.101472294 | 0.000723362  | 5.116390133  | 2.02E-05 | 0.049222008 | chr15 | 64915229  |
| cg22734086 | 0.131178675 | 0.002177675  | 5.101900288  | 2.10E-05 | 0.050954529 | chr2  | 26785367  |
| cg03638937 | 0.899692614 | 0.000344158  | 5.099149062  | 2.11E-05 | 0.051083749 | chr11 | 393570    |
| cg19117063 | 0.85992299  | -0.002057472 | -5.090451512 | 2.17E-05 | 0.052053837 | chr6  | 32365553  |
| cg27114028 | 0.900260914 | -0.00046465  | -5.08237003  | 2.21E-05 | 0.052954441 | chr12 | 122217423 |
| cg15654458 | 0.959023791 | -0.006989363 | -5.078898925 | 2.24E-05 | 0.053197258 | chr6  | 88053106  |
| cg20673481 | 0.090080495 | 0.000767717  | 5.073037876  | 2.27E-05 | 0.053792791 | chr2  | 18059454  |
| cg21463869 | 0.934615773 | -0.000464212 | -5.061301089 | 2.35E-05 | 0.055277157 | chr8  | 39442078  |
| cg08022819 | 0.824545402 | -0.000528015 | -5.052812137 | 2.40E-05 | 0.056301739 | chr16 | 29884806  |
| cg17966192 | 0.203473908 | 0.003420789  | 5.037511209  | 2.50E-05 | 0.058424749 | chr2  | 108994116 |
| cg00010108 | 0.882981709 | -0.000641968 | -5.025215184 | 2.59E-05 | 0.060133233 | chr4  | 1615271   |
| cg18349863 | 0.479330229 | -0.002604841 | -5.016824884 | 2.65E-05 | 0.061037222 | chr6  | 29912713  |
| cg12602374 | 0.09471996  | 0.000452137  | 5.015208581  | 2.66E-05 | 0.061037222 | chr5  | 38557162  |
| cg14601050 | 0.960149108 | -0.000767064 | -5.014545542 | 2.67E-05 | 0.061037222 | chr17 | 73727533  |
| cg25302936 | 0.092171499 | 0.000678438  | 5.011189081  | 2.69E-05 | 0.061310766 | chr8  | 67579596  |
| cg09428031 | 0.07654756  | 0.000744376  | 5.007209179  | 2.72E-05 | 0.061691973 | chr4  | 48782361  |
| cg11432034 | 0.082187228 | 0.000368601  | 4.997772224  | 2.79E-05 | 0.062822668 | chr3  | 13520913  |
| cg12944659 | 0.778370494 | -0.006796246 | -4.997164813 | 2.79E-05 | 0.062822668 | chr11 | 15957513  |
| cg00916536 | 0.1807976   | 0.001488341  | 4.994288474  | 2.82E-05 | 0.063026919 | chr2  | 87017419  |
| cg09510924 | 0.874339241 | 0.000757512  | 4.987456654  | 2.87E-05 | 0.063794033 | chr17 | 17860297  |
| cg11752440 | 0.081788321 | 0.00058898   | 4.986508939  | 2.88E-05 | 0.063794033 | chr11 | 102980466 |
| cg05600935 | 0.808381342 | -0.000655049 | -4.982136889 | 2.91E-05 | 0.064211843 | chr7  | 102132012 |
| cg19242610 | 0.933503472 | -0.003335792 | -4.980796883 | 2.92E-05 | 0.064211843 | chr1  | 161569954 |
| cg12341757 | 0.128318451 | 0.000591978  | 4.97855039   | 2.94E-05 | 0.064316472 | chr8  | 134582241 |
| cg09059250 | 0.948554195 | -0.000756917 | -4.974237475 | 2.98E-05 | 0.064787627 | chr12 | 98095166  |
| cg15671450 | 0.111227399 | 0.006058617  | 4.970621137  | 3.01E-05 | 0.065139355 | chr6  | 29895116  |

|            |             |              |              |          |             |       |           |
|------------|-------------|--------------|--------------|----------|-------------|-------|-----------|
| cg26967186 | 0.929026631 | -0.001202011 | -4.963801553 | 3.06E-05 | 0.066070486 | chr7  | 157919649 |
| cg18049513 | 0.945494592 | -0.000444641 | -4.948381637 | 3.19E-05 | 0.068610944 | chr11 | 541660    |
| cg14403130 | 0.092025438 | 0.000703841  | 4.927188185  | 3.38E-05 | 0.072384228 | chr1  | 44873057  |
| cg06586505 | 0.919720343 | -0.000356082 | -4.91839684  | 3.47E-05 | 0.073820135 | chr13 | 112611028 |
| cg19540702 | 0.070819942 | 0.000912555  | 4.912328107  | 3.52E-05 | 0.074476063 | chr19 | 19281175  |
| cg04931090 | 0.157107743 | 0.000637595  | 4.911967513  | 3.53E-05 | 0.074476063 | chr6  | 35181888  |
| cg03156904 | 0.114312473 | 0.002717599  | 4.905474536  | 3.59E-05 | 0.075481919 | chr18 | 13801143  |
| cg06345693 | 0.920127933 | -0.00044612  | -4.893449607 | 3.71E-05 | 0.077335385 | chr12 | 133158310 |
| cg14951598 | 0.388958365 | -0.000993076 | -4.893846407 | 3.71E-05 | 0.077335385 | chr6  | 41472931  |
| cg16776350 | 0.136285511 | 0.0009883    | 4.891740629  | 3.73E-05 | 0.077365555 | chr1  | 160549158 |
| cg16487237 | 0.093760386 | 0.000631253  | 4.883922377  | 3.81E-05 | 0.078269087 | chr3  | 137487248 |
| cg19458602 | 0.922234544 | -0.000514982 | -4.884263076 | 3.81E-05 | 0.078269087 | chr19 | 7992003   |
| cg20767025 | 0.091233436 | 0.000520609  | 4.882645098  | 3.82E-05 | 0.078269087 | chr7  | 128431850 |
| cg24797456 | 0.954984332 | -0.001441798 | -4.881294824 | 3.84E-05 | 0.078269087 | chr4  | 76622044  |
| cg00952054 | 0.881183598 | -0.00056435  | -4.858797001 | 4.08E-05 | 0.082436561 | chr1  | 9437047   |
| cg19835136 | 0.869850851 | -0.000897008 | -4.858935453 | 4.08E-05 | 0.082436561 | chr19 | 17650995  |
| cg07053873 | 0.111403503 | -0.00070201  | -4.855244723 | 4.12E-05 | 0.082436561 | chr11 | 117049953 |
| cg01962146 | 0.226519828 | 0.001066526  | 4.854220747  | 4.13E-05 | 0.082436561 | chr4  | 995931    |
| cg09948336 | 0.867760011 | 0.000883983  | 4.85477096   | 4.13E-05 | 0.082436561 | chr11 | 64394492  |
| cg24509591 | 0.94278851  | 0.000308972  | 4.853213804  | 4.14E-05 | 0.082436561 | chr8  | 75779095  |
| cg22488797 | 0.142373594 | 0.002152587  | 4.85061986   | 4.17E-05 | 0.082684366 | chr5  | 134363324 |
| cg20313496 | 0.162942352 | 0.001492582  | 4.847299362  | 4.21E-05 | 0.083099186 | chr1  | 155579807 |
| cg07274406 | 0.063027355 | 0.000581754  | 4.845571718  | 4.23E-05 | 0.083154568 | chr21 | 46334192  |
| cg14258143 | 0.120848596 | 0.00111668   | 4.829399822  | 4.42E-05 | 0.086562772 | chr1  | 32714146  |
| cg15925143 | 0.831760493 | -0.00131757  | -4.826454624 | 4.46E-05 | 0.086912044 | chr6  | 170575847 |
| cg25643819 | 0.188115741 | 0.001382865  | 4.82330272   | 4.50E-05 | 0.087313444 | chr6  | 30227942  |
| cg20313856 | 0.871137817 | -0.001221699 | -4.820395623 | 4.53E-05 | 0.08765941  | chr2  | 38825345  |
| cg21412456 | 0.834894785 | -0.004485084 | -4.782742688 | 5.02E-05 | 0.096775651 | chr1  | 26608782  |
| cg02779467 | 0.088165314 | 0.001184856  | 4.780692013  | 5.05E-05 | 0.096868598 | chr17 | 18761289  |
| cg04682862 | 0.126435355 | 0.001018565  | 4.779498763  | 5.07E-05 | 0.096868598 | chr16 | 66304367  |
| cg10642820 | 0.074310271 | 0.000373523  | 4.767088319  | 5.24E-05 | 0.099817164 | chr5  | 64777786  |
| cg01747792 | 0.101937908 | 0.000768892  | 4.764461476  | 5.28E-05 | 0.100143509 | chr20 | 61806628  |
| cg01952509 | 0.115690495 | -0.000407107 | -4.746180314 | 5.55E-05 | 0.104863131 | chr3  | 44380113  |
| cg25852545 | 0.075922817 | -0.000301738 | -4.732972271 | 5.75E-05 | 0.108294768 | chr3  | 113775465 |
| cg09746279 | 0.130911001 | 0.000823382  | 4.721949429  | 5.93E-05 | 0.111174345 | chr6  | 29895016  |
| cg24878755 | 0.058516668 | -0.000391051 | -4.71919711  | 5.98E-05 | 0.111582494 | chr6  | 139349590 |
| cg18801028 | 0.903454526 | -0.000471008 | -4.715708993 | 6.03E-05 | 0.111926797 | chr1  | 29646475  |
| cg22766014 | 0.05337914  | 0.000304126  | 4.71526378   | 6.04E-05 | 0.111926797 | chr2  | 69241106  |
| cg02836479 | 0.040330568 | 0.00033023   | 4.713533956  | 6.07E-05 | 0.11202929  | chr16 | 21964489  |
| cg23099265 | 0.905457089 | -0.003740647 | -4.706431021 | 6.19E-05 | 0.113244587 | chr7  | 1515564   |
| cg02927058 | 0.922639635 | -0.000636483 | -4.705430797 | 6.20E-05 | 0.113244587 | chr1  | 10116780  |
| cg22677240 | 0.678201562 | -0.001799194 | -4.705732524 | 6.20E-05 | 0.113244587 | chr1  | 147802979 |
| cg26853340 | 0.897010561 | -0.000860147 | -4.699480724 | 6.31E-05 | 0.114668775 | chr15 | 81409649  |
| cg16676472 | 0.33224467  | -0.002245031 | -4.689106344 | 6.49E-05 | 0.117523745 | chr19 | 42363949  |
| cg12306213 | 0.087258851 | 0.000440607  | 4.67810379   | 6.69E-05 | 0.120657878 | chr6  | 71666824  |
| cg17073392 | 0.116980145 | 0.002042516  | 4.65839184   | 7.05E-05 | 0.126857454 | chr15 | 69324108  |
| cg24426536 | 0.118999282 | 0.001190257  | 4.656969862  | 7.08E-05 | 0.126880901 | chr1  | 161500610 |

|            |             |              |              |             |             |       |           |
|------------|-------------|--------------|--------------|-------------|-------------|-------|-----------|
| cg04284317 | 0.114555765 | -0.000474081 | -4.653897372 | 7.14E-05    | 0.127479119 | chr10 | 120101832 |
| cg08057411 | 0.899850756 | -0.000525032 | -4.650392998 | 7.21E-05    | 0.128232927 | chr16 | 84988003  |
| cg03045133 | 0.879293342 | -0.003121566 | -4.645063598 | 7.32E-05    | 0.129165257 | chr6  | 29870056  |
| cg12733040 | 0.921294971 | -0.000631431 | -4.644152434 | 7.33E-05    | 0.129165257 | chr22 | 17303493  |
| cg21190253 | 0.927538209 | -0.000659362 | -4.643734682 | 7.34E-05    | 0.129165257 | chrX  | 33231153  |
| cg07578215 | 0.928053416 | -0.000475047 | -4.635190711 | 7.52E-05    | 0.131735212 | chr1  | 236157114 |
| cg15975217 | 0.095187527 | 0.001135726  | 4.633628402  | 7.55E-05    | 0.131822177 | chr4  | 140656926 |
| cg14866419 | 0.090010841 | -0.000575617 | -4.622602237 | 7.78E-05    | 0.135166264 | chr14 | 100704911 |
| cg04310824 | 0.075999594 | 0.000394323  | 4.621540098  | 7.80E-05    | 0.135166264 | chr1  | 53393297  |
| cg09464883 | 0.946348167 | -0.000411118 | -4.620434895 | 7.82E-05    | 0.135166264 | chr4  | 79689621  |
| cg07873178 | 0.104193922 | 0.000547552  | 4.619212201  | 7.85E-05    | 0.135166264 | chr11 | 65307616  |
| cg13457172 | 0.133325677 | 0.001054331  | 4.617718444  | 7.88E-05    | 0.135238704 | chr10 | 118897847 |
| cg10890016 | 0.925603846 | 0.000609194  | 4.608151343  | 8.09E-05    | 0.138326283 | chr7  | 885027    |
| cg03292213 | 0.108769443 | 0.00316018   | 4.60657035   | 8.13E-05    | 0.138436716 | chr17 | 17109640  |
| cg02880176 | 0.128238172 | 0.001577418  | 4.600466452  | 8.26E-05    | 0.140268903 | chr17 | 17109817  |
| cg24433586 | 0.891860697 | -0.000668306 | -4.592222665 | 8.45E-05    | 0.142958821 | chr17 | 79210494  |
| cg27544294 | 0.67499761  | -0.001095846 | -4.589789659 | 8.51E-05    | 0.143410924 | chr22 | 25082493  |
| cg11050622 | 0.072360537 | 0.000823623  | 4.585319606  | 8.61E-05    | 0.14466762  | chr14 | 31090974  |
| cg18805978 | 0.914160798 | -0.000634198 | -4.579000604 | 8.76E-05    | 0.146674626 | chr2  | 130734711 |
| cg23003881 | 0.054853025 | 0.000612604  | 4.570684366  | 8.96E-05    | 0.149320708 | chr5  | 173043929 |
| cg02110963 | 0.929078123 | -0.000547945 | -4.569922797 | 8.98E-05    | 0.149320708 | chr6  | 10434975  |
| cg11802806 | 0.909639683 | -0.000368488 | -4.568002487 | 9.03E-05    | 0.149592253 | chr1  | 25748133  |
| cg14141549 | 0.89643638  | -0.001605693 | -4.552226914 | 9.42E-05    | 0.155634754 | chr7  | 157919408 |
| cg11149073 | 0.076591289 | -0.00038044  | -4.545795405 | 9.59E-05    | 0.157796756 | chr17 | 11900221  |
| cg17428043 | 0.056233648 | 0.000678751  | 4.544677867  | 9.62E-05    | 0.157796756 | chr1  | 180200104 |
| cg12304937 | 0.539549857 | 0.001900768  | 4.53929317   | 9.76E-05    | 0.159036393 | chr7  | 680013    |
| cg04259358 | 0.07346013  | 0.000650348  | 4.538106288  | 9.79E-05    | 0.159036393 | chr10 | 119590450 |
| cg14099398 | 0.186308635 | 0.002505866  | 4.538341238  | 9.79E-05    | 0.159036393 | chr17 | 17109800  |
| cg12877335 | 0.46190966  | 0.002739542  | 4.53562813   | 9.86E-05    | 0.159344229 | chr12 | 94539319  |
| cg09678228 | 0.115043022 | -0.000780213 | -4.534950212 | 9.88E-05    | 0.159344229 | chr12 | 44230058  |
| cg05037927 | 0.121111067 | 0.001604273  | 4.520929443  | 0.000102635 | 0.165001025 | chr2  | 61372117  |
| cg11290181 | 0.850960414 | -0.002666254 | -4.515323023 | 0.000104214 | 0.166503225 | chr5  | 130604045 |
| cg11528572 | 0.779837022 | 0.00077958   | 4.515179559  | 0.000104255 | 0.166503225 | chr7  | 6915508   |
| cg24538947 | 0.124431377 | 0.000882256  | 4.511152303  | 0.000105405 | 0.167754161 | chr2  | 26785301  |
| cg18697487 | 0.928399176 | -0.000518929 | -4.51002435  | 0.000105729 | 0.167754161 | chr19 | 1502095   |
| cg22338567 | 0.095321338 | 0.00088163   | 4.507773895  | 0.000106379 | 0.167780927 | chr7  | 107642444 |
| cg05338731 | 0.029586107 | 0.005152326  | 4.507573942  | 0.000106437 | 0.167780927 | chr22 | 23489041  |
| cg23543615 | 0.064419577 | 0.001312361  | 4.500790452  | 0.000108422 | 0.170356344 | chr19 | 19281185  |
| cg10005475 | 0.885424623 | -0.000891348 | -4.495904675 | 0.000109874 | 0.171359058 | chr17 | 74011063  |
| cg09453870 | 0.112789648 | 0.001777457  | 4.493022275  | 0.00011074  | 0.171359058 | chr15 | 69324156  |
| cg09199225 | 0.954975346 | -0.004142846 | -4.492989646 | 0.00011075  | 0.171359058 | chr6  | 32149260  |
| cg04927341 | 0.95101204  | -0.000642985 | -4.492871565 | 0.000110785 | 0.171359058 | chr1  | 86576497  |
| cg22502715 | 0.127873201 | 0.002683032  | 4.492740681  | 0.000110825 | 0.171359058 | chr1  | 247171572 |
| cg06902219 | 0.123487162 | 0.002525693  | 4.490979245  | 0.000111358 | 0.171636282 | chr6  | 29856294  |
| cg26092192 | 0.933036226 | -0.000930873 | -4.487578157 | 0.000112394 | 0.172684851 | chr17 | 80759678  |
| cg15549251 | 0.945749217 | -0.000506464 | -4.482617688 | 0.000113922 | 0.17448061  | chr15 | 40426006  |
| cg05442111 | 0.660676876 | 0.000853368  | 4.476634532  | 0.000115792 | 0.176053785 | chr11 | 89901285  |

|            |             |              |              |             |             |       |           |
|------------|-------------|--------------|--------------|-------------|-------------|-------|-----------|
| cg17653969 | 0.943212799 | -0.000509176 | -4.47537295  | 0.000116191 | 0.176053785 | chr1  | 229439834 |
| cg23070111 | 0.100166411 | 0.000423679  | 4.474766636  | 0.000116383 | 0.176053785 | chr1  | 186649985 |
| cg18881269 | 0.888510759 | -0.000458198 | -4.474713959 | 0.000116399 | 0.176053785 | chr12 | 6936267   |
| cg07139509 | 0.178658928 | 0.002907067  | 4.469490701  | 0.000118066 | 0.177794759 | chr14 | 70038717  |
| cg26473478 | 0.104468748 | 0.002296888  | 4.468816566  | 0.000118283 | 0.177794759 | chr6  | 30614823  |
| cg04724720 | 0.124701505 | -0.00044323  | -4.462351737 | 0.000120382 | 0.180157091 | chr11 | 65640939  |
| cg01667185 | 0.886408539 | -0.000559745 | -4.461698201 | 0.000120597 | 0.180157091 | chr11 | 66625638  |
| cg08362486 | 0.933685473 | -0.000318986 | -4.458495879 | 0.000121652 | 0.18063424  | chr16 | 4935615   |
| cg02230705 | 0.082523635 | 0.000625103  | 4.458471628  | 0.00012166  | 0.18063424  | chr4  | 100867350 |
| cg00963654 | 0.118143932 | 0.00221996   | 4.454930837  | 0.000122838 | 0.181826901 | chr18 | 13801271  |
| cg05948856 | 0.886753418 | -0.000443575 | -4.450997103 | 0.00012416  | 0.182954999 | chr19 | 3982825   |
| cg00634652 | 0.896783366 | 0.000750265  | 4.449556011  | 0.000124647 | 0.182954999 | chr13 | 112166963 |
| cg04186471 | 0.92017841  | -0.000326629 | -4.449311034 | 0.00012473  | 0.182954999 | chrX  | 153523440 |
| cg22161299 | 0.547767139 | 0.000863014  | 4.44670974   | 0.000125616 | 0.183400701 | chr19 | 11468272  |
| cg11224271 | 0.86359668  | -0.000507794 | -4.446202263 | 0.00012579  | 0.183400701 | chr3  | 129744515 |
| cg18957138 | 0.075720266 | 0.000271954  | 4.437719301  | 0.000128726 | 0.187119901 | chr9  | 73027331  |
| cg17508462 | 0.097863506 | 0.000494422  | 4.432517825  | 0.00013056  | 0.189219296 | chr5  | 180542340 |
| cg20971958 | 0.906547361 | -0.001500561 | -4.424342336 | 0.000133495 | 0.192897286 | chr4  | 1594894   |
| cg26463106 | 0.104151195 | 0.001105056  | 4.421196096  | 0.000134642 | 0.193977208 | chr3  | 9404837   |
| cg12030638 | 0.620803557 | 0.0010577    | 4.419246981  | 0.000135357 | 0.194430938 | chrX  | 133675340 |
| cg26801241 | 0.16901549  | 0.00090033   | 4.416163196  | 0.000136497 | 0.195489494 | chr16 | 47495768  |
| cg17988326 | 0.783915748 | 0.001044757  | 4.413010539  | 0.000137672 | 0.196429069 | chr1  | 41091703  |
| cg05704893 | 0.077568024 | 0.000285431  | 4.412235567  | 0.000137962 | 0.196429069 | chr17 | 7982773   |
| cg17163751 | 0.102910303 | -0.000473405 | -4.407312383 | 0.000139821 | 0.198493289 | chr10 | 71812596  |
| cg04864199 | 0.07551187  | -0.000423976 | -4.405086819 | 0.000140669 | 0.199115408 | chr15 | 45493327  |
| cg03958058 | 0.969342626 | -0.007193203 | -4.403470567 | 0.000141288 | 0.19941062  | chr10 | 133761284 |

**Supplementary Table S4: CpGs associated with progesterone levels in PCOS patients**

| Row.names  | intercept    | beta         | t            | pval     | qval        | chr   | pos       |
|------------|--------------|--------------|--------------|----------|-------------|-------|-----------|
| cg00762003 | 1.098857134  | -0.616724321 | -6.64908018  | 3.25E-07 | 0.056684002 | chr21 | 45393541  |
| cg08188400 | 0.126165778  | 0.046313032  | 6.546351782  | 4.26E-07 | 0.056684002 | chr19 | 7969347   |
| cg07286123 | 0.102539658  | 0.035158316  | 6.542625459  | 4.30E-07 | 0.056684002 | chr20 | 23067126  |
| cg09546220 | 0.86888161   | -0.050653241 | -6.280399517 | 8.63E-07 | 0.085272869 | chr21 | 40036490  |
| cg02496295 | 0.171304643  | 0.07600485   | 6.19650408   | 1.08E-06 | 0.085348933 | chr4  | 2846155   |
| cg20947082 | 0.386072142  | 0.05318017   | 6.085557348  | 1.45E-06 | 0.095739393 | chr1  | 233749643 |
| cg15361028 | 0.106809472  | 0.033900248  | 6.00556114   | 1.80E-06 | 0.101737571 | chr6  | 53658683  |
| cg26847156 | 0.947833861  | -0.060621147 | -5.775799583 | 3.35E-06 | 0.136502163 | chr18 | 10550303  |
| cg07455790 | 0.86261056   | -0.139314841 | -5.773635372 | 3.37E-06 | 0.136502163 | chr6  | 31650735  |
| cg18726518 | 0.958558694  | -0.028964356 | -5.756047821 | 3.54E-06 | 0.136502163 | chr12 | 132924516 |
| cg03580106 | 0.156620317  | 0.104059743  | 5.684403084  | 4.29E-06 | 0.136502163 | chr16 | 89283057  |
| cg26775843 | 0.143536217  | 0.066163413  | 5.681400005  | 4.33E-06 | 0.136502163 | chr4  | 88343678  |
| cg22211395 | 0.028264357  | 0.043649311  | 5.667635755  | 4.49E-06 | 0.136502163 | chr5  | 80597321  |
| cg00738945 | 0.834725938  | 0.064204995  | 5.610385075  | 5.25E-06 | 0.140826711 | chr6  | 32340354  |
| cg00173538 | 0.831999484  | 0.047928257  | 5.602336074  | 5.36E-06 | 0.140826711 | chr6  | 42071219  |
| cg03190929 | 0.937169066  | -0.026025455 | -5.557803459 | 6.05E-06 | 0.140826711 | chr17 | 38075855  |
| cg21298523 | -0.036778528 | 0.36120398   | 5.532864798  | 6.48E-06 | 0.140826711 | chr4  | 88343936  |
| cg13940125 | 0.999138128  | -0.219025372 | -5.51228039  | 6.85E-06 | 0.140826711 | chr1  | 197237119 |

|            |             |              |              |          |             |       |           |
|------------|-------------|--------------|--------------|----------|-------------|-------|-----------|
| cg06128688 | 0.395258122 | -0.126079643 | -5.49526667  | 7.18E-06 | 0.140826711 | chr12 | 96883733  |
| cg09817985 | 0.75962029  | 0.098774591  | 5.491054892  | 7.26E-06 | 0.140826711 | chr20 | 25054507  |
| cg23522832 | 0.087983364 | 0.021278099  | 5.479690659  | 7.49E-06 | 0.140826711 | chr1  | 45769727  |
| cg24856518 | 0.08016155  | 0.024899728  | 5.424092067  | 8.71E-06 | 0.15640179  | chr2  | 120517676 |
| cg08428486 | 0.898561846 | -0.090272945 | -5.369345666 | 1.01E-05 | 0.172930917 | chr7  | 140452281 |
| cg12905273 | 0.067532901 | 0.043649968  | 5.346996044  | 1.07E-05 | 0.172930917 | chr6  | 33359440  |
| cg10572624 | 0.859286085 | -0.037291684 | -5.340349521 | 1.09E-05 | 0.172930917 | chr1  | 40428318  |
| cg00484206 | 0.886855097 | 0.038066988  | 5.286763813  | 1.27E-05 | 0.186982636 | chr16 | 66041033  |
| cg13588800 | 0.358803292 | -0.109242946 | -5.266638145 | 1.34E-05 | 0.186982636 | chr7  | 19155785  |
| cg01546814 | 1.113419379 | -0.5147582   | -5.252685326 | 1.39E-05 | 0.186982636 | chr16 | 4295972   |
| cg19919446 | 0.107107906 | 0.033241105  | 5.242720891  | 1.43E-05 | 0.186982636 | chr3  | 98241922  |
| cg03774288 | 0.886771586 | 0.043049401  | 5.240846733  | 1.44E-05 | 0.186982636 | chr10 | 131647543 |
| cg24665612 | 1.111509811 | -0.471811288 | -5.232912236 | 1.47E-05 | 0.186982636 | chrX  | 134971730 |
| cg19796532 | 0.530991201 | -0.138842486 | -5.210535573 | 1.56E-05 | 0.191042237 | chr12 | 50426901  |
| cg07013326 | 0.197362117 | 0.08674269   | 5.202157316  | 1.60E-05 | 0.191042237 | chr6  | 57037090  |
| cg18264486 | 0.814866139 | -0.222866994 | -5.167952656 | 1.75E-05 | 0.197791888 | chr6  | 31650916  |
| cg10499042 | 0.943534533 | -0.027587165 | -5.163175652 | 1.78E-05 | 0.197791888 | chr2  | 141650127 |
| cg01904243 | 0.330719707 | -0.103568522 | -5.157600618 | 1.80E-05 | 0.197791888 | chr14 | 74251254  |
